07-06-2021

1 Core and indicative bacterial and fungal taxa define characteristic soil communities of arable  
2 land, grassland, and forest

3

4 Gschwend Florian<sup>1</sup>, Hartmann Martin<sup>2</sup>, Mayerhofer Johanna<sup>1</sup>, Hug Anna<sup>3</sup>, Enkerli Jürg<sup>1</sup>,

5 Gubler Andreas<sup>3</sup>, Meuli Reto G.<sup>3</sup>, Frey Beat<sup>4</sup>, Widmer Franco<sup>1</sup>

6 <sup>1</sup>) Molecular Ecology, Agroscope, Zürich, Switzerland

7 <sup>2</sup>) Sustainable Agroecosystems, Department of Environmental Systems Science, Institute of

8 Agricultural Sciences, ETH, Zürich, Switzerland

9 <sup>3</sup>) Swiss Soil Monitoring Network, Agroscope, Zürich, Switzerland

10 <sup>4</sup>) Rhizosphere Processes, Swiss Federal Research Institute WSL, Birmensdorf, Switzerland

11

12 Corresponding author:

13 Franco Widmer

14 Molecular Ecology

15 Agroscope

16 Reckenholzstrasse 191

17 CH-8046 Zürich

18 Switzerland

19 franco.widmer@agroscope.admin.ch

20

21

07-06-2021

## 22 Abstract

23 Soil microbial diversity has major influences on ecosystem functions and services. However,  
24 due to its complexity and uneven distribution of abundant and rare taxa, quantification of soil  
25 microbial diversity remains challenging and thereby impeding its integration into long-term  
26 monitoring programs. Using metabarcoding, we analyzed soil bacterial and fungal  
27 communities over five years at thirty long-term soil monitoring sites from the three land-use  
28 types, arable land, permanent grassland, and forest. Unlike soil microbial biomass and alpha-  
29 diversity, microbial community compositions and structures were site- and land-use-specific  
30 with CAP reclassification success rates of 100%. The temporally stable site core communities  
31 included 38.5% of bacterial and 33.1% of fungal OTUs covering 95.9% and 93.2% of relative  
32 abundances. We characterized bacterial and fungal core communities and their land-use  
33 associations at the family-level. In general, fungal families revealed stronger land-use type  
34 associations as compared to bacteria. This is likely due to a stronger vegetation effect on  
35 fungal core taxa, while bacterial core taxa were stronger related to soil properties. The  
36 assessment of core communities can be used to form cultivation-independent reference lists  
37 of microbial taxa, which may facilitate the development of microbial indicators for soil quality  
38 and the use of soil microbiota for long-term soil biomonitoring.

39

## 40 Keywords:

41 Amplicon sequencing, soil microbial diversity, core taxa, core communities, environmental  
42 drivers, temporal stability

07-06-2021

## 43 1. Introduction

44  
45 Soil microorganisms constitute the majority of soil biodiversity (Bardgett and van der Putten  
46 2014) and are main drivers of many soil processes (Costa *et al.* 2018, Hallin *et al.* 2018). A  
47 detailed understanding of belowground microbial diversity and of its influencing factors is the  
48 basis for a holistic view and understanding of ecosystem processes in terrestrial environments.  
49 However, a census of soil microorganisms remains largely incomplete, due to the enormous  
50 diversity and range of abundances of soil microorganisms. High microbial diversities have  
51 been observed at different scales ranging from aggregate (Hemkemeyer *et al.* 2019,  
52 Hemkemeyer *et al.* 2018), to landscape (Karimi *et al.* 2018), and global assessments (Bahram  
53 *et al.* 2018, Větrovský *et al.* 2019).

54  
55 At the land-scape scale, soil bacterial and fungal diversities are strongly correlated to soil pH  
56 (Griffiths *et al.* 2011, Lauber *et al.* 2009), which is caused by direct effects but also by indirect  
57 effects such as changing the availability of nutrients (Glassman *et al.* 2017, Lammel *et al.*  
58 2018). The number of bacterial taxa in soils depends on the pH and has been reported to reach  
59 its maximum at pH values between 6 and 7 (Lauber *et al.* 2009). Furthermore, community  
60 structures of soil bacteria change with pH, because specific bacterial taxa reveal distinct pH  
61 preferences. For instance, within the phylum Acidobacteria, taxa belonging to the class  
62 Acidobacteriia are in general negatively correlated to soil pH, while taxa belonging to  
63 Acidobacteria Subgroup 6 commonly reveal a positive correlation to soil pH (Kielak *et al.* 2016).  
64 Further drivers of bacterial community structures depend on the system studied and include  
65 factors such as soil texture, climate, and plant communities (Bahram *et al.* 2018, Griffiths *et al.*  
66 2016, Karimi *et al.* 2018, Leff *et al.* 2018). In comparison to soil bacterial diversity, soil fungal  
67 diversity has been shown to be geographically more structured (Bahram *et al.* 2018, Talbot *et al.*  
68 *et al.* 2014). In a global meta-analysis that covered 742 sites, Větrovský *et al.* (2019) identified  
69 climate factors as main drivers of soil fungal communities, followed by soil properties, and  
70 vegetation parameters. Finally, factors related to land management, such as agricultural  
71 intensity (Banerjee *et al.* 2019), tillage (Babin *et al.* 2019, Degruene *et al.* 2017), fertilization

07-06-2021

72 (Hartmann *et al.* 2015, Piazza *et al.* 2019), or compaction (Hartmann *et al.* 2014) may influence  
73 diversity of soil bacteria and fungi. While the major environmental determinants of soil bacterial  
74 and fungal communities are largely known, less is known about common components of these  
75 communities, their taxonomic representatives, and their diversities.

76

77 Surveys of soil bacterial and fungal communities usually reveal a large number of unknown  
78 taxa. Delgado-Baquerizo (2019) has reported that in a global survey 99% of bacterial and 63%  
79 of fungal OTUs remained unclassified at the species-level, and that the number of unclassified  
80 bacterial or fungal OTUs at the phylum-level in a sample has ranged between 1.4% and 9.4%.

81 In a meta-analysis on the global diversity of soil fungi, an average of only 53% of the sequences  
82 per sample could be assigned to entries in the UNITE reference database, which notably  
83 includes sequences from environmental samples (Větrovský *et al.* 2019). High ratios of

84 unclassified sequences at the species level may be due to a lack of resolution of the used DNA  
85 barcodes (e.g. Gschwend *et al.* 2021), or due to missing reference sequences. To elucidate  
86 the unknown microbial diversity and describe consistently occurring OTUs, several attempts

87 have been made to identify the most common taxa, which could constitute a core of soil  
88 microbial communities (Delgado-Baquerizo *et al.* 2018, Egidi *et al.* 2019). OTUs contributing  
89 to the global bacterial soil core community were assigned in descending order of relative

90 abundance to the phyla Proteobacteria, Actinobacteria, Planctomycetes, Chloroflexi,  
91 Verrucomicrobia, Bacteroidetes, Gemmatimonadetes, Firmicutes, Armatimonadetes,  
92 Saccharibacteria, and candidate division WS2 (Delgado-Baquerizo *et al.* 2018). Five of these

93 phyla, i.e., Proteobacteria, Actinobacteria, Planctomycetes, Bacteroidetes, and Firmicutes,  
94 have also been reported among those with an average relative abundance of at least 5% in a  
95 soil bacterial survey across France (Karimi *et al.* 2018), which has identified Acidobacteria as

96 an additional dominant phylum. Dominant soil bacterial phyla have revealed distinct ecological  
97 preferences such as Alphaproteobacteria and Verrucomicrobia that were more abundant in  
98 forest and permanent grassland as compared to arable and vineyard soils, while the inverse

99 was found for Chloroflexi and Gemmatimonadetes (Karimi *et al.* 2018). However, diverse

07-06-2021

100 habitat associations are often detected for taxa assigned to the same phylum. For instance  
101 within the phylum Chloroflexi, the family Anaerolineaceae were associated to soils with pH  
102 above 5, while Ktedonobacteraceae were associated to a lower soil pH (Mayerhofer *et al.*  
103 2021). For soil fungi, a global survey of 365 sites has revealed Ascomycota, Basidiomycota,  
104 Mortierellomycota, and Mucoromycota as dominant fungal phyla in soils (Tedersoo *et al.*  
105 2014), which has been largely confirmed, although the high abundance of Mortierellomycota  
106 has been questioned (Větrovský *et al.* 2019). Egidi *et al.* (2019) have proposed that globally  
107 dominant soil fungal OTUs almost exclusively derived from Ascomycota with 80 of 83 dominant  
108 fungal OTUs classified to this phylum. Despite the recent interest in taxonomic surveys of soil  
109 bacterial (Delgado-Baquerizo *et al.* 2018, Karimi *et al.* 2018, Walsh *et al.* 2019) and fungal  
110 diversity (Egidi *et al.* 2019, Tedersoo *et al.* 2017), habitat associations of soil bacteria and fungi  
111 at lower taxonomic levels are still largely lacking.

112  
113 In a previous study, thirty long-term monitoring sites of the Swiss Soil Monitoring Network  
114 (NABO) were surveyed over five years, and it has been shown that soil bacterial and fungal  
115 communities of different sites remained temporally stable and compositionally distinct  
116 (Gschwend *et al.* submitted). However, that study has focused on community structures and  
117 treated OTUs as anonymous entities without assessing their taxonomy. Furthermore, temporal  
118 dynamics of soil bacterial and fungal community structures have been assessed but detailed  
119 analyses of environmental drivers of community structures among land-use types, and the  
120 individual sites have not been provided. Detailed descriptions of habitat associations of  
121 bacterial and fungal taxa are, for instance, also needed to develop microbial indicators for  
122 biological assessments of soil quality.

123  
124 Here, we assess bacterial and fungal diversity and community structures at thirty sites of the  
125 NABO. Our main research goals were to characterize consistently detected OTUs over several  
126 years, which allow for a robust assessment of soil microbial communities along with their  
127 habitat associations. Specifically, our research aimed to i) assess site- and land-use-specific

07-06-2021

128 soil microbial communities; ii) identify OTUs, which are consistently detected (core OTUs) as  
129 well as taxa indicative of environmental factors (indicative OTUs); iii) assess the main  
130 environmental factors structuring core communities; iv) describe diversity and identity of core  
131 OTUs as well as their distribution among land-use types.

132

133

## 134 2. Material and Methods

135

### 136 2.1 Sampling design, DNA extraction, and microbial biomass measurement

137 Samples were taken during five years, from 2012 to 2016, at thirty sites (Figure S1) of the  
138 Swiss Soil Monitoring Network (NABO) in early spring after snow melt and before fertilization.  
139 Three land-use types, i.e. arable land, permanent grassland, and forests were sampled with  
140 ten sites each. Arable sites were managed with crop rotations, which included three to six  
141 different crops, and with one exception they were conventionally tilled. Forest sites included  
142 four coniferous, two mixed, and four deciduous forests. At each site, three composite samples  
143 composed of 25 soil cores of 20 cm depth and 2.5 cm diameter were taken from a 10 m by 10  
144 m plot according to the standardized sampling protocol of the Swiss Soil Monitoring Network  
145 (Gubler *et al.* 2019). Samples were immediately stored at 4°C after sampling and processed  
146 within 48 hours. Homogenized soil was mixed with DNA extraction buffer ([2% hexadecyl  
147 trimethyl ammonium chloride (CTAB); 20 mM EDTA pH 8; 2 M NaCl; 100 mM tris  
148 hydroxymethylaminomethane pH 8; 2% polyvinylpyrrolidone (PVP-40)], (Lazzaro *et al.* 2006).  
149 Quantitative DNA extraction was achieved by extracting DNA three times from each sample  
150 following Bürgmann *et al.* (2001) with the modifications by Hartmann *et al.* (2005). DNA  
151 quantity was determined using PicoGreen (Invitrogen, Carlsbad, CA) on a Cary Eclipse  
152 fluorescence spectrophotometer (Varian, Inc. Palo Alto, CA) and cross-validated using Qubit  
153 1.0 (Life Technologies, Carlsbad, CA, USA). DNA was cleaned using the NucleoSpin® gDNA  
154 clean-up kit (Machery-Nagel, Düren, Germany) according to the manufacturer's instruction.  
155 Microbial biomass carbon ( $C_{mic}$ ) was assessed using chloroform-fumigation-extraction

07-06-2021

156 according to Vance *et al.* (1987) with a  $k_{EC}$  value of 0.45 (Joergensen 1996). Measurements  
157 of soil physico-chemical properties, i.e., soil pH, total and organic carbon, total nitrogen, C/N-  
158 ratio, bulk density, soil texture, and gravimetric water content, have been described in  
159 Gschwend *et al.* (submitted).

160

## 161 2.2 Barcode amplification, sequencing, and sequence analysis

162 Bacterial variable region 3 and 4 of the small sub-unit of the ribosomal RNA gene (16S rRNA)  
163 were amplified using primers 341F (5' CCTAYGGGDBGCWSCAG 3') and 806R (5'  
164 GGACTACNVGGGTHCTAAT 3') (Frey *et al.* 2016). Fungal internal transcribed spacer 2  
165 (ITS2) was amplified using primers ITS3 (5' CAHCGATGAAGAACYRG 3') and ITS4 (5'  
166 TCCTSCGCTTATTGATATGC 3') (Tedersoo *et al.* 2014). Four reactions using the GoTaq®  
167 Hot Start Polymerase (Promega) were done for each sample using 20 ng of DNA for each  
168 reaction. Reactions were performed according to Mayerhofer *et al.* (2017) with two  
169 modifications, which were an initial denaturation at 95°C for two minutes, as well as 35 PCR  
170 cycles for the bacterial and fungal markers. Production of sequencing libraries and paired-end  
171 sequencing on an Illumina MiSeq v3 were performed at the Génome Québec Innovation  
172 Center at the McGill University (Montréal, Canada). Raw sequences, (NCBI SRA:  
173 XXXXXX) were quality filtered using a custom sequence analysis pipeline largely based on  
174 USEARCH version 9 (Edgar 2010, Frey *et al.* 2016) and is described in greater detail in  
175 Gschwend *et al.* submitted). Only sequences occurring in at least two samples were allowed  
176 to form OTU centroids. Sequences were clustered into OTUs based on a 97% sequence  
177 identity threshold. This threshold was chosen to obtain a conservative estimate of soil microbial  
178 diversity and because diversity patterns between OTUs and sequence variants based  
179 approaches are highly correlated (Glassman and Martiny 2018). Taxonomic assignment was  
180 obtained using the RDP classifier implemented in mothur version 1.36.1 (Schloss *et al.* 2009)  
181 and a minimum bootstrap value of 80% with the SILVA 132 database (Quast *et al.* 2012) as  
182 reference for bacterial sequences. Eukaryotic sequences were classified with the same  
183 approach to a Genbank database (Frey *et al.* 2016) to discriminate between fungal and other

07-06-2021

184 eukaryote sequences. Fungal sequences were subsequently compared to the UNITE v 7.2  
185 reference database (Nilsson *et al.* 2018).

186

### 187 *2.3 Statistics*

188 All analyses unless stated otherwise, were performed in R (R Core Team 2016, RStudio 2015).

189 Mean values of environmental factors were calculated for samples taken at the same time

190 point to avoid pseudo-replication. Similarly, calculations of alpha- and beta-diversity values

191 were based on median values of OTUs per sampling time point. To get independent samples

192 for the assessment of similarities and differences between land-use types, median values of

193 OTUs were obtained per site followed by Jaccard and Bray-Curtis similarity calculations.

194 Spearman correlations were used to link univariate responses to environmental factors.

195 Multivariate responses of communities were assessed by PERMDISP (Anderson *et al.* 2006)

196 to evaluate homogeneity of dispersions between groups and permutational analysis of

197 variance (PERMANOVA, Anderson 2001) to analyse between group differences. PRIMER7

198 (Anderson *et al.* 2008, Clarke and Warwick 2001) was used for PERMANOVA. PERMANOVA

199 design included land-use types as a fixed factor, sites as random factor nested within land-use

200 type, and year as a random factor. Effects on community structures were expressed as square

201 root of component of variation ( $\sqrt{CV}$ ), which are in the unit of the original community

202 dissimilarity, i.e., Bray-Curtis dissimilarity. The order of covariates in sequential PERMANOVA

203 tests were selected based on the model selection algorithm implemented in distance-based

204 linear model (DISTLM, McArdle and Anderson 2001) within PRIMER7, where AICc was

205 chosen as model selection criterion. P-values of multiple tests were adjusted using Benjamini-

206 Hochberg procedure (Benjamini and Hochberg 1995). Site specificity was further assessed by

207 leave-one-out cross-validation based on linear discriminant analysis (LDA) for univariate and

208 based on canonical analysis of principal coordinates (CAP, Anderson and Willis 2003) for

209 community structures. LDA and CAP were calculated within R using the functions 'train' of the

210 package caret (Kuhn 2008) and 'CAPdiscrim' of the package 'BiodiversityR' (Kindt and Coe



07-06-2021

211 2005), respectively. Ternary plots were drawn using the R package ggtern 3.0.0.1 (Hamilton  
212 and Ferry 2018).

213

#### 214 *2.4 Definition of OTU groups*

215 We distinguished two OTU groups, i.e., ‘core’ and “indicative’ OTUs, which included two or  
216 three subgroups, respectively (Table 1). Core OTUs were defined based on their consistent  
217 occurrence at a site or in a land-use type. Site core OTUs (sc-OTUs), were defined as OTUs  
218 that occur in at least 80% of the 15 samples from a given site. Similarly, land-use type core  
219 OTUs (lc-OTUs), were defined as OTUs that are sc-OTUs in at least 80% of the 10 sites of a  
220 given land-use type. Indicative OTUs included three subgroups , which were i) correlated to  
221 an environmental factor, ii) indicative for land-use types, or iii) indicative for an individual site.  
222 The first subgroup was defined based on a Spearman correlation of  $|\rho| > 0.4$  ( $p < 0.05$ ) with  
223 an environmental factor. Subgroups two and three were defined based on indicator species  
224 analysis using the ‘indicspecies’ R-package (De Cáceres and Legendre 2009). OTUs with an  
225 adjusted p-value smaller than 0.05 and an indicator value higher than 0.8 for a single or a  
226 combination of land-use types, or for individual sites were termed ‘land-use-indicative’ and  
227 ‘site-indicative’ OTUs (Table 1). Therefore, land-use- and site-indicative OTUs have a  
228 significantly higher relative abundance and occurrence in a given land-use type or site. In  
229 contrast, the definition of core OTUs does not include information of the OTU abundance and  
230 occurrence in other land-use types or sites.

231

232

### 233 **3. Results**

234

#### 235 *3.1 Increasing resolution from microbial biomass to community structures*

236 Thirty sites from three land-use types, i.e., ten each from arable land, permanent grassland,  
237 and forest, were surveyed with yearly samplings during five years, which yielded 450 samples.

238 Soil microbial communities were assessed using three different approaches, which were i) soil

07-06-2021

239 microbial biomass, i.e., based on soil microbial carbon ( $C_{mic}$ ) content determined with  
240 chloroform fumigation extraction, and soil DNA content, that correlated ( $\rho = 0.79$ ,  $p < 0.0001$ ),  
241 ii) alpha-diversity based on OTU richness, Simpson evenness, and inverse Simpson index,  
242 and iii) beta-diversity based on Jaccard similarities and Bray-Curtis dissimilarities (Table 2, but  
243 see also supplementary results for a summary of the sequencing data). Microbial biomass and  
244 alpha-diversity revealed no site- (reclassification  $\leq 4.7\%$ ), and low land-use-specificity  
245 (reclassification  $\leq 61.3\%$ , Table 2). Values of both microbial biomass measures were  
246 significantly reduced in arable land (Tukey HSD,  $p \leq 0.0007$ , Table S1), while bacterial alpha-  
247 diversity was increased in arable land (Tukey HSD,  $p = 0.0096$ , Table S1). Fungal alpha-  
248 diversity with the exception of fungal OTU richness were significantly lower in forest soils  
249 (Tukey HSD,  $p \leq 0.01$ , Table S1). Community compositions (Jaccard similarity) and structures  
250 (Bray-Curtis dissimilarity) were land-use- (Figure 1) and site-specific with reclassification  
251 success rates of 100% for bacteria and fungi (Table 2). Consequently, information on  
252 community composition or structure was needed for resolving the different drivers of bacterial  
253 and fungal communities in soil.

254

### 255 *3.2 Partitioning of OTUs into core and indicative groups*

256 The high site-specificity of soil bacterial and fungal community structures, which was  
257 maintained over five years, also reflected a high temporal stability. Temporally stable core taxa,  
258 i.e., site-core (sc) OTUs and land-use type core (lc) OTUs were defined as outlined in Table 1.  
259 Of the 18 140 bacterial OTUs (bOTUs) 6 979 (38.5%), which covered 95.9% relative  
260 abundance were classified as sc-OTUs and 1 136 of these sc-OTUs (covering 69.1% relative  
261 abundance) were also classified as lc-OTUs (Table 3). A similar proportion of the 8 477 fungal  
262 OTUs (fOTUs), i.e., 2 802 fOTUs (33.1%) and covering 93.2% relative abundance, was  
263 classified as sc-OTUs, but only 103 of them (29.4% relative abundance) were also classified  
264 as lc-OTUs. In addition to these core taxa, we defined indicative OTUs, i.e., OTUs that  
265 structured communities according to environmental conditions. More specifically, we  
266 distinguished three categories of indicative OTUs, i.e., OTUs correlated to environmental

07-06-2021

267 factor, as well as OTUs indicative for land-use types and OTUs indicative of a given site (see  
268 Table 1 for definitions). Most strikingly, the number and particularly the abundance of site-  
269 indicative OTUs was higher for fungi (1 445 fOTUs, 29.9% relative abundance), as compared  
270 to bacteria (1 146 bOTUs, 3.1% relative abundance). The vast majority of indicative OTUs  
271 were also classified as sc-OTUs (95% for bacteria, 90% for fungi, Figure S2). Communities  
272 composed of only sc-OTUs, i.e., core communities, were almost perfectly correlated ( $\rho \geq$   
273 0.97) to the entire communities, both in terms of alpha- and beta-diversity (Table S2).  
274 Consequently, soil microbial core communities are representative of the respective entire  
275 communities. The following analyses were therefore based on these core communities.

276

### 277 *3.3 Environmental factors driving structures of core communities*

278 Soil bacterial and fungal core communities were mainly structured by soil pH and the C/N-ratio  
279 (Table 4). In addition to the environmental factors considered, land-use type and site  
280 significantly explained variance of soil bacterial ( $\sqrt{CV_{\text{Land-use type}}} = 0.23$ ,  $\sqrt{CV_{\text{Site}}} = 0.31$ ), and  
281 fungal ( $\sqrt{CV_{\text{Land-use type}}} = 0.31$ ,  $\sqrt{CV_{\text{Site}}} = 0.49$ ) community structures. Soil pH was the strongest  
282 driver for bacterial community structures overall and within each land-use type (Table S3). The  
283 second strongest environmental factor in the overall analysis was the C/N-ratio, but it had no  
284 or minimal effects on the community structures within land-use types (Table S3 & S4). This  
285 may be due to the clear difference in C/N-ratio between forest and the other two land-use types  
286 (Table S1), indicating that a high C/N-ratio represented a proxy for forest soils in the overall  
287 analysis. The separate analysis of arable sites also allowed to consider crop as an additional  
288 factor shaping microbial communities (Table S3 & S4), which was more strongly affecting  
289 fungal ( $\sqrt{CV} = 0.16$ ) as compared to bacterial ( $\sqrt{CV} = 0.06$ ) core communities. In line with the  
290 data on core community structures, the strongest correlations of individual OTUs to  
291 environmental factors were detected with soil pH for bacterial OTUs (Table S5), and with soil  
292 pH, C/N-ratio, and organic carbon for fungal OTUs (Table S6).

293

294

07-06-2021

### 295 *3.4 Association of bacterial and fungal core OTUs to land-use types*

296 The similarities of bacterial and fungal communities among land-use types were highest  
297 between arable and permanent grassland soils, while they were lowest between arable and  
298 forest soils (AG and AF in Figure 2). The similarity between communities from forest and  
299 permanent grassland sites was higher for bacteria than for fungi, which was particularly  
300 striking, when relative abundances were considered as accounted for in Bray Curtis similarities  
301 (FG in Figure 2c & d). To assess these differences in greater detail, the distribution of core  
302 taxa among the land-use types were analyzed using ternary plots, which depict the abundance  
303 of sc-OTUs in each land-use type and in all combinations (Figure 3). The ternary plots clearly  
304 revealed different distributions of bacterial and fungal sc-OTUs among land-use types. On the  
305 one hand, bacterial sc-OTUs were distributed among the land-use types and all their  
306 combinations except for the combination of 'arable land and forest', for which only two lc-OTUs  
307 were detected (Figure 3a). Eighty-seven bacterial sc-OTUs were core of all three land-use  
308 types (AGF in Figure 3a). On the other hand, fungal sc-OTUs were accumulated along the  
309 axes of arable land to permanent grassland and in forest (Figure 3b). Only three fungal sc-  
310 OTUs were cores of all three land-use types and no land-use type core was detected for the  
311 combination of arable land and forest (Figure 3b). The difference in bacterial and fungal  
312 distributions among the land-use types was also evident from the number of sc-OTUs with at  
313 least 80% of their abundance in a single land-use type (Figure 3, red tips of the ternary plots).  
314 For bacteria, the number of such sc-OTUs that not necessarily represented an lc-OTU, was  
315 highest in arable soils (1 239 bOTUs), slightly less in forest (967 bOTUs), and lowest in  
316 permanent grassland (308 bOTUs). For fungi, more sc-OTUs were predominantly detected in  
317 forest (1 231 fOTUs), as compared to permanent grassland (502 fOTUs) and arable land (424  
318 fOTUs).

319

### 320 *3.5 Distribution of bacterial and fungal families among land-use types*

321 For taxonomic characterization of core communities, we focused on the family level, since the  
322 classified OTUs can be more reliably assigned at this level and since the number of

07-06-2021

323 unclassified OTUs increased at lower taxonomic levels. For instance, 50.7% of the bacterial  
324 and 47.1% of the fungal OTUs were unclassified at the family-level, while these numbers were  
325 78.0% for bacterial and 60.3% for fungal OTUs at the genus-level. In order to analyze  
326 associations of families to land-use types, we extracted sc-OTUs that were predominantly  
327 associated to a single or combinations of land-use types based on the ternary plot (Figure 4a).  
328 The ten most abundant families in each of the seven areas specified in the ternary plot, i.e.,  
329 triangles A, G, F, AG, GF, AF, and AGF, were extracted. They covered in the selected areas  
330 18.7% and 49.2% of the overall relative abundance of bacterial and fungal sc-OTUs,  
331 respectively, (Figure 4b, dark grey area) and resulted in a list of 39 bacterial and 38 fungal  
332 families (Figure 4c & 4d). Cluster analysis was used to group these families according to their  
333 distribution patterns in the land-use types, which yielded seven bacterial and five fungal  
334 clusters (Figure 4c & 4d). More homogenous representations of land-use types within the  
335 clusters were found for fungi as compared to bacteria. Most strikingly, fungal cluster V, which  
336 was composed of families such as Myxotrichaceae, Inocybaceae, and Russulaceae, occurred  
337 most strongly and almost exclusively in forest soils. Clusters predominantly associated to  
338 permanent grassland included only one bacterial family, the Ktedonobacteraceae (cluster IV,  
339 Figure 4c), but eight fungal families, e.g., Mortierellaceae and Chaetothyriaceae (cluster IV,  
340 Figure 4d). Within the clusters, also groupings with more resolved land-use type associations  
341 were revealed. For instance, within fungal cluster IV the fungal families Mortierellaceae  
342 Clavariaceae and Herpotrichiellaceae were all most abundant in permanent grassland but  
343 revealed a complex occurrence pattern in many land-use types, while the fungal family  
344 Chaetothyriaceae was exclusively detected in permanent grassland soils. Similarly, within  
345 fungal cluster III, which was mainly associated to arable land, some families such as  
346 Lasiosphaeriaceae and Nectriaceae were also prominently detected in the combination 'arable  
347 land and permanent grassland' while the Bulleribasidiaceae, as an exemption in cluster III,  
348 were more abundant in the combination 'arable land and permanent grassland' but comparably  
349 abundant in 'arable land'. For bacteria, such clear clustering was less pronounced. Cluster VI  
350 exclusively associated to 'arable land' but for instance in cluster VII only eleven of the thirteen

07-06-2021

351 families were most abundant in forest soils. Within cluster VII, families such as  
352 Pedosphaeraceae or the candidate WD2101 soil group were also commonly detected in arable  
353 and permanent grassland soils. The strongest forest associations were observed for families  
354 Acidobacteriaceae Subgroup 1 as well as Acetobacteraceae, Methylococcaceae,  
355 Acidothermaceae, and Micropepsaceae. Therefore, stronger associations to land-use types or  
356 their combinations were detected for fungi as compared to bacteria. This was further supported  
357 by the number of families with their highest abundance in a single land-use type (A, G, or F),  
358 which was lower for bacteria (20, Figure 4c) as compared to fungi (30, Figure 4d).

359  
360 To detect families, which showed the strongest and most consistent associations to land-use  
361 types, we compared core and indicative OTUs. More specifically, we first selected OTUs, which  
362 were core and indicative of the same land-use type or land-use type combinations and  
363 aggregated these OTUs at the family-level. This yielded 304 bacterial (Table S7) and 58 fungal  
364 OTUs (Table S8). Then, we selected families, which included at least four (Bacteria) or two  
365 (Fungi) OTUs that were both core and indicative of the same land-uses (Table 5). This resulted  
366 in 16 bacterial and 9 fungal families (Table 5), which were also among the families described  
367 in Figure 4, with the exception of bacterial candidate groups SC-I-84 and AKYH767, as well as  
368 the fungal family Phaeosphaeriaceae. Two bacterial families, Anaerolineaceae and  
369 Pyrinomonadaceae included arable core and indicative OTUs and a single bacterial family,  
370 Acidobacteriaceae Subgroup 1, included only forest core and indicative OTUs. No bacterial  
371 family included only OTUs that were core and indicative of permanent grassland soils. Among  
372 fungi Chaetomiaceae and Myxotrichaceae included only OTUs that were core and indicative  
373 of a single land-use type, i.e., arable land and forest, respectively. No fungal family included  
374 exclusively OTUs that were core and indicative of permanent grassland soils. Furthermore, no  
375 bacterial and fungal OTUs were core and indicative of the combination 'arable land and forest'  
376 and only bacterial but no fungal families included OTUs that were core and indicative of  
377 'permanent grassland and forest'. The lack of such OTUs is consistent with the few sc-OTUs  
378 detected in the corresponding areas of the ternary plots (Figure 3), as well as with low

379 similarities of bacterial and fungal communities among arable and forest sites, and equally low  
380 similarities among fungal communities of permanent grassland and forest sites (Figure 2).

381

382

## 383 4. Discussion

384

### 385 4.1 Land-use-specificity of soil bacterial and fungal communities

386 Soil bacterial and fungal communities were surveyed during five years at thirty sites of the  
387 Swiss Soil Monitoring Network including three different land-use types, i.e., arable land,  
388 permanent grassland, and forest. This revealed communities that were highly specific to land-  
389 use types and sites, and which were stable over five years. A detailed analysis on the temporal  
390 stability of these communities has already been described (Gschwend *et al.* submitted). Here,  
391 we focused on the environmental drivers that shape this land-use- and site-specificity of soil  
392 bacterial and fungal communities, as well as on their taxonomic compositions.

393 Each land-use type was characterized by differences in the combinations of soil properties,  
394 management, and vegetation (Table S1). In arable soils, pH and bulk density were increased,  
395 while carbon contents were equal or lower than in permanent grassland and forest soils.  
396 Furthermore, management of arable soils included crop rotations, tillage (except one site),  
397 mineral and organic fertilization, as well as plant protection, which are known to influence soil  
398 bacterial and fungal communities (Hartmann *et al.* 2015, Peralta *et al.* 2018, Rivera-Becerril *et*  
399 *al.* 2017). Microbial biomass was significantly reduced in arable soils as compared to  
400 permanent grassland and forest soils (Table S1), which confirms earlier findings (Dequiedt *et*  
401 *al.* 2011). Bacterial communities in arable soils were characterized by families such as  
402 Anaerolineaceae, Pyrinomonadaceae, and Gemmatimonadaceae. Anaerolineaceae are  
403 widely distributed in soils, and particularly prevalent in low-oxygen environments, e.g., in  
404 compacted soils (Hartmann *et al.* 2014) or paddy fields (Jiao *et al.* 2019). As they may act as  
405 indicators for soil oxygen depletion (Gschwend *et al.* 2020), their high abundance in arable  
406 soils may be a sign of soil compaction in arable land due to common management practices

07-06-2021

407 with heavy machinery. Fungal communities in arable soils were for instance characterized by  
408 Lasiosphaeriaceae, Plectosphaerellaceae, Chaetomiaceae, and Mrakiaceae. With the  
409 exception of the basidiomycetous yeasts Mrakiaceae and Cystofilobasidiaceae (Liu *et al.*  
410 2015), fungal families associated to arable soils also occurred in permanent grassland soils  
411 (Figure 4). For instance, Plectosphaerellaceae that include important soil-borne plant  
412 pathogens such as *Verticillium* (Giraldo and Crous 2019) had two lc-OTUs that were also  
413 indicative for arable land, as well as one that was indicative for 'arable land and permanent  
414 grassland' (Table 5). In these cases, OTUs assigned to the same family have distinct land-use  
415 type associations, which may for instance be driven by species-specific host plant preferences  
416 (Klosterman *et al.* 2009).

417 Permanent grassland soils were characterized by soil property values, which lay between  
418 those of arable and forest soils (Table S1). Their management included fertilization, mowing,  
419 and grazing, which may change soil bacterial and fungal community structures (Cui *et al.* 2020,  
420 Gilmullina *et al.* 2020, Kaiser *et al.* 2016). A single bacterial family, the Ktedonobacteraceae  
421 (phylum Chloroflexi) had their highest abundance in the permanent grassland section of the  
422 ternary plot, but also occurred in forest and less in arable soils (Figure 4c).  
423 Ktedonobacteraceae are aerobic, mycelium-forming bacteria and contain a single genus with  
424 one described species, i.e., *Ktedonobacter racemifer*, which was isolated from soil of a black  
425 locust forest in Italy (Cavaletti *et al.* 2006). Metabarcoding of bacterial communities from 2 173  
426 soil samples across France revealed sequences assigned to *Ktedonobacter* in 80% of all  
427 samples, and attributed this genus to one of the dominant genera of soil bacteria (Karimi *et al.*  
428 2018). Families that characterized fungal communities in permanent grasslands included for  
429 instance the grassland-specific Chaetothyriaceae (Figure 4d). Chaetothyriaceae include  
430 mainly epiphytic species living on plants (Quan *et al.* 2020) suggesting that their distribution  
431 may depend on host plants. However, in a survey of switchgrass-associated fungal  
432 communities, OTUs attributed to this family have also been detected associated to the  
433 switchgrass roots and adjacent soils, but not on plant leaves (Lee and Hawkes 2020),  
434 indicating that Chaetothyriaceae also include soil fungi.



07-06-2021

435 Forest soils were characterized by relatively high contents of carbon, higher C/N-ratios, and  
436 lower soil pH as compared to the arable soils (Table S1). Bacterial families associated to forest  
437 soils included Acidobacteriaceae Subgroup 1, Acetobacteraceae, Acidothermaceae, as well  
438 as the more widely distributed WD2101 soil group, and Pedosphaeraceae (Figure 4c, Table  
439 5). Acidobacteriaceae Subgroup 1 have been repeatedly reported to negatively correlate with  
440 soil pH (Kielak *et al.* 2016) and revealed increased abundances in soils with a pH below 6.5  
441 (Jones *et al.* 2009). Acetobacteraceae have also been reported to strongly and negatively  
442 correlate with soil pH and to have higher abundances in forest as compared to grassland soils  
443 (Nacke *et al.* 2011). Therefore, soil pH, which is well known to be a major driver of soil bacterial  
444 communities (e.g. Karimi *et al.* 2018, Lauber *et al.* 2009), was the main factor determining  
445 forest associated soil bacterial taxa. Fungal communities in forest soils were mainly composed  
446 of ectomycorrhizal families such as Russulaceae, Inocybaceae, and Clavulinaceae, which is  
447 in agreement with previous findings (e.g. Frey *et al.* 2021). Thirteen fungal families were  
448 strongly associated to forest (Cluster V, Figure 4d), but only one of these, the Myxotrichaceae,  
449 included indicative OTUs of forest soils (Table S8). This is likely explained by the different  
450 forest ecosystems including deciduous, mixed and coniferous forests that have been sampled.  
451 As ectomycorrhizal fungi depend on their host tree species (Bahnmann *et al.* 2018), none of  
452 these families occurred at eight or more forest sites and were thus not generally indicative for  
453 forest soils. Myxotrichaceae included for instance *Oidiodendron* spp., which were repeatedly  
454 detected among the abundant soil fungi in metabarcoding surveys of Swiss forest soils (Frey  
455 *et al.* 2020, Hartmann *et al.* 2017), and which are common saprobes in acid soils but some of  
456 which also form ericoid mycorrhiza (Rice and Currah 2005). Therefore, their widespread and  
457 indicative distribution in various forest soil ecosystem may relate to a dependence on  
458 understory vegetation, or on the general preference for acidic soils.

459

#### 460 *4.2 Similarities of soil bacterial and fungal communities among land-use types*

461 The similarities among soil bacterial communities from different land-use types were lowest for  
462 the combination of arable land and forest (Figure 2), which was also the only land-use type

07-06-2021

463 combination for which no bacterial lc-OTU was indicative (Table 5). Similarities between soil  
464 bacterial communities from arable and permanent grassland soils corresponded to values  
465 observed between permanent grassland and forest soils (Figure 2). This suggests that soil  
466 bacterial communities represented a sequential order following the soil properties and the land-  
467 use intensity from arable land, to permanent grassland and forest. For fungi, similarities from  
468 communities of permanent grassland and forest soils were equally low as among communities  
469 of arable and forest soils (Figure 2). Furthermore, no fungal OTUs was found that was  
470 indicative and land-use core for the combination 'permanent grassland and forest' or the  
471 combination 'arable land and forest' (Table 5). Therefore, soil fungal, unlike bacterial,  
472 communities revealed little overlap (Bray-Curtis < 0.10, Figure 2) between permanent  
473 grassland and forest soils. Considering dissimilarities among communities as proxies for the  
474 transfer of soil microorganisms among sites allows describing the structure of their  
475 metacommunities (Beck *et al.* 2019, Wisnoski and Lennon 2021). In this view, soil bacterial  
476 communities of arable, permanent grassland, and forest soils formed a single metacommunity,  
477 which was characterized by a continuous change from arable land, to permanent grassland  
478 and forest. Soil fungal communities, however, formed two metacommunities, one created by  
479 fungal communities of arable and permanent grassland soils and the other by fungal  
480 communities of forest soils.

481 The distinct structures of soil bacterial and fungal metacommunities can be explained by  
482 different factors influencing their community assembly. On the one hand, bacterial  
483 communities were more strongly structured by soil properties and climatic factors as compared  
484 to soil fungal communities (Table 4). On the other hand, soil fungal communities were more  
485 strongly structured by vegetation as compared to soil bacterial communities. For instance,  
486 acidophilic bacterial families predominantly occurred in forest soils (Figure 4c), while  
487 ectomycorrhizal fungal families dominated soil fungal communities in forest soils (Figure 4d).  
488 Confirming our results Frey *et al.* (2021) reported stronger effects of tree species on fungal as  
489 compared to bacterial community structures. Stronger vegetation effects on soil fungal as  
490 compared to bacterial communities were also revealed in the other land-use types, as crops

07-06-2021

491 had a stronger effect on soil fungal as compared to bacterial community structures (Table S3  
492 & S4), which is in agreement with the findings of Ai *et al.* (2018). Stronger legacy effects of  
493 different grassland mixtures on soil fungal as compared to soil bacterial communities have  
494 been described in a grassland field experiment (Fox *et al.* 2020), which further supports the  
495 stronger impact of plants on soil fungal as compared to bacterial communities.

496

#### 497 *4.3 Potential use of sc-OTUs to provide a temporally stable, cultivation-independent reference* 498 *list of dominant taxa*

499 Site core OTUs accounted for 38.5% of bacterial and 33.1% of fungal OTUs, but covered  
500 95.9% and 93.2% of relative abundance (Table 3). As sc-OTUs occurred in at least four of the  
501 five years, the large majority of retrieved sequences, could be attributed to temporally stable  
502 OTUs. Furthermore, these sc-OTUs not only were temporally stable but also included 95% of  
503 bacterial and 90% of fungal indicative OTUs (Figure S2) and were representative of the  
504 diversities of entire communities (Table S2). Therefore, sc-OTUs may be used to build a  
505 cultivation-independent, temporally stable reference set for the analysis of soil microbial  
506 diversity. Such reference sets are of particular interest for predictive modelling of soil bacterial  
507 and fungal diversity, and may also be used as reference values for long-term soil quality  
508 monitoring (Gschwend *et al.* submitted). Currently, long-term monitoring systems of soil  
509 biodiversity are largely lacking (Guerra *et al.* 2020, Leeuwen *et al.* 2017), which is particularly  
510 concerning given the ongoing environmental changes and the central role of soil biodiversity  
511 for global ecosystem processes. Finally, sc-OTUs provide support to establish lists of the most  
512 characteristic soil microorganisms, for which cultivation strategies or whole-genome  
513 sequencing are particularly valuable (Carini 2019). Currently, still too few dominating soil  
514 bacterial and fungal taxa have cultured representatives or available genome sequences, which  
515 would enable more detailed insight into their functions in the ecosystem (Delgado-Baquerizo  
516 *et al.* 2018, Egidi *et al.* 2019, Steen *et al.* 2019).

517

518

## 519 5. Conclusions

520  
521 While microbial biomass and alpha-diversity measures at thirty long-term monitoring sites  
522 revealed only few differences among land-use types and sites, community compositions  
523 (Jaccard similarity) and structures (Bray-Curtis dissimilarity) yielded characteristic descriptors  
524 for each land-use type and site. Therefore, resolution obtained by metabarcoding were  
525 necessary to accurately describe soil bacterial and fungal communities. Temporally stable core  
526 OTUs accounted for 95.9% of bacterial and 93.2% of fungal sequences. These core OTUs  
527 were representative of entire communities and showed responses to distinct habitats. In total  
528 4 184 indicative bacterial and 1 968 indicative fungal OTUs, of which 95% and 90% were also  
529 temporally stable core OTUs, were identified. These yield promising targets for the  
530 development of microbial indicators for robust soil quality analyses. Bacterial and fungal  
531 families were identified that revealed strong associations to one or more land-use types. In  
532 general, fungal families revealed stronger associations to land-use types, which may be  
533 explained by the stronger influences of vegetation on fungi as compared to bacteria, whereas  
534 bacteria were more strongly correlated with soil properties. Consequently, metacommunities  
535 of soil bacteria and fungi were differently structured. On the one hand, bacterial communities  
536 represented a sequential order following soil properties and land-use intensity from arable  
537 land, to permanent grassland and forest. On the other hand, fungal communities of forest sites  
538 showed only minor similarities to those from arable land and permanent grassland sites. The  
539 robustly assessed and temporally stable core OTUs may serve as references for future surveys  
540 of soil bacterial and fungal diversity. This may facilitate long-term soil quality monitoring by  
541 detecting disturbances of the characteristic habitat associated core communities, and it may  
542 also enable the development of predictive modelling for metabarcoding based soil quality  
543 analyses.

544

545

07-06-2021

546 **6. Funding**

547 This work was supported by the Agroscope research program 'Microbial Biodiversity', and the  
548 Swiss Federal Office for the Environment (FOEN).

549 **7. Acknowledgments**

550 We thank Peter Schwab, Ramon Zimmermann, and further group members of the Swiss Soil  
551 Monitoring Network for soil sampling, Stephanie Pfister, Sonja Reinhard, and Beat Stierli for  
552 laboratory analyses, and Aaron Fox for valuable comments to the manuscript.

553 Figures

554

555 Figure 1

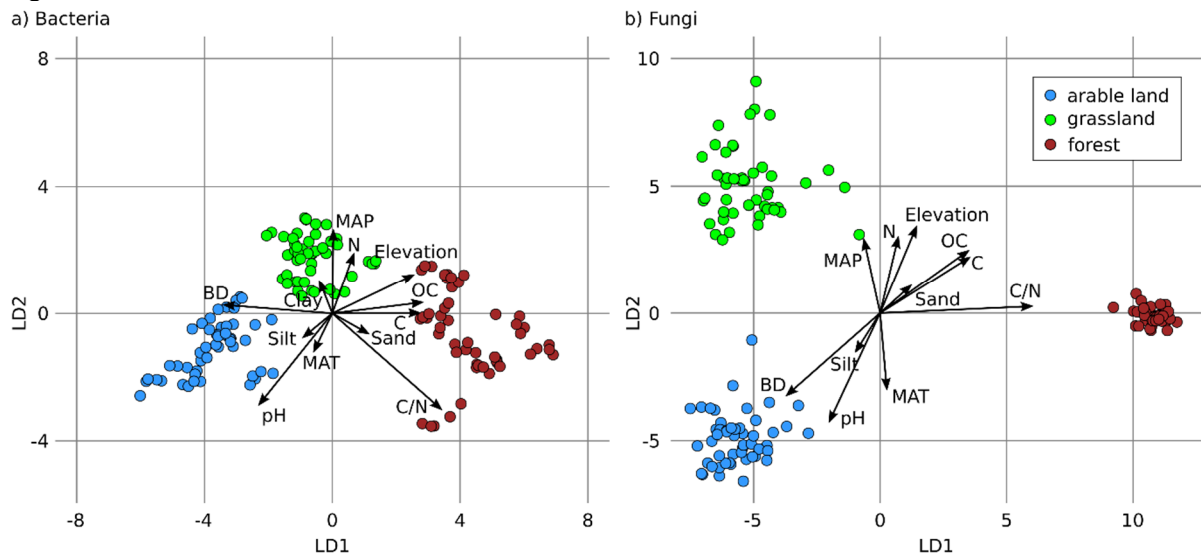

556

557 Figure 1: Separation of bacterial (A) and fungal (B) communities by land-use and correlated  
558 environmental factors. Three land-use types, i.e., arable land (blue), permanent grassland  
559 (green), and forest (brown), were sampled with 10 sites each. Per site, 15 samples were  
560 obtained with yearly triplicates during five years. Average communities for yearly replicates  
561 are shown (N = 150). Ordinations are based on canonical analyses of principal coordinates  
562 (CAP) constrained by land-use types. Axes show linear discriminants (LD). Arrows indicate  
563 significant correlations of communities to environmental factors, i.e., bulk density (BD), clay,  
564 silt, sand, pH, mean annual temperature (MAT), mean annual precipitation (MAP), ratio of  
565 C/N (C/N), total carbon (C) and nitrogen (N), organic carbon (OC), and elevation.

566 Figure 2

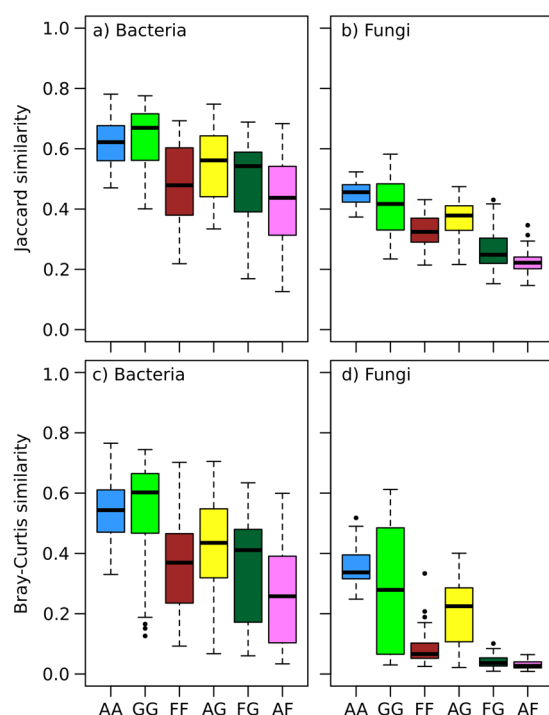

567

568 Figure 2: Pairwise comparisons of bacterial (a, c) and fungal (b, d) communities composed of  
569 core OTUs for a site, i.e., OTUs that occurred in at least 12 of the 15 samples from a site.  
570 Boxplots showing Jaccard (a, b) and Bray-Curtis (c, d) similarities between two sites  
571 depending on their land-use type. The Jaccard similarity corresponds to the ratio of shared  
572 OTUs between two sites, while the Bray-Curtis similarity takes also the relative abundance of  
573 each OTU into account. Sites of three land-use types, i.e. arable land (A), grassland (G), and  
574 forest (F), were assessed in pairwise combinations of the same land-use type (AA, GG and  
575 FF) as well as between different land-use types (AG, FG and AF).

07-06-2021

576 Figure 3

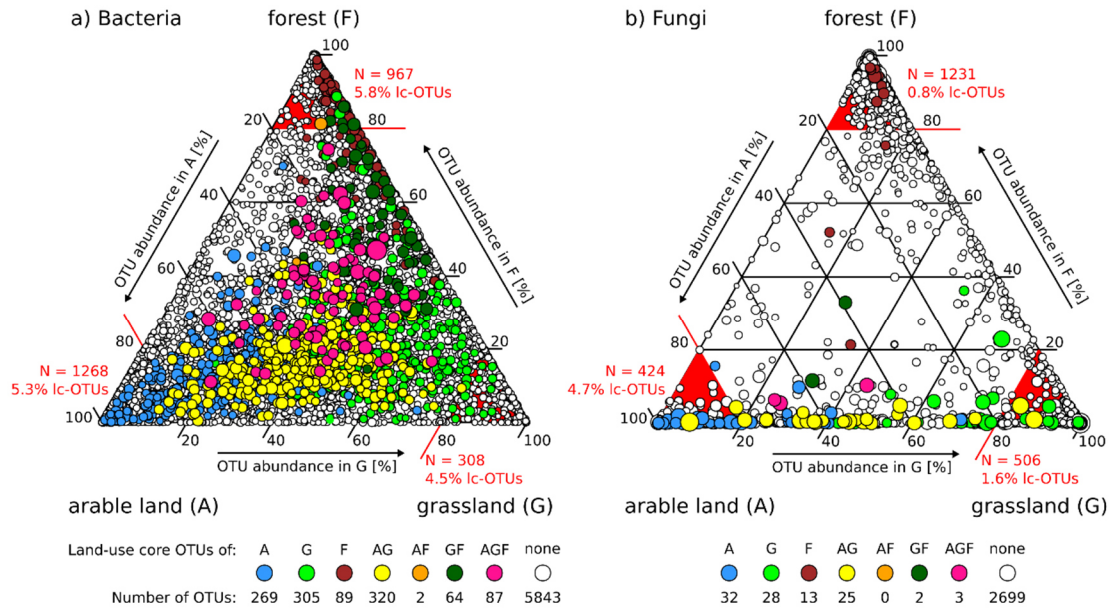

577  
 578 Figure 3: Ternary plots showing occurrences of the 6 979 bacterial (A) and 2 802 fungal (B)  
 579 site core OTUs in the three land-use types and their combinations. Circles represent site  
 580 core OTUs (sc-OTUs) and circle sizes indicate their relative abundance. Colored OTUs  
 581 represent sc-OTUs, which are also land-use type core OTUs (lc-OTUs) from individual or  
 582 combination of land-use types. White circles correspond to sc-OTUs, which are not part of  
 583 land-use type core communities. The numbers of lc-OTUs of each land-use type or land-use  
 584 type combinations are indicated below the ternary plots. The sc-OTUs were defined as OTUs  
 585 occurring in 12 of 15 samples from a site and lc-OTUs as OTUs, which are sc-OTUs in 8 of  
 586 10 sites from a land-use type. Red lines and red triangles highlight the plot area, in which sc-  
 587 OTUs occur which obtain at least 80% of their sequences from the respective single land-use  
 588 type. The number of these sc-OTUs and the percent of lc-OTUs among these are indicated  
 589 in red at the corners of the ternary plots.  
 590



591 Figure 4

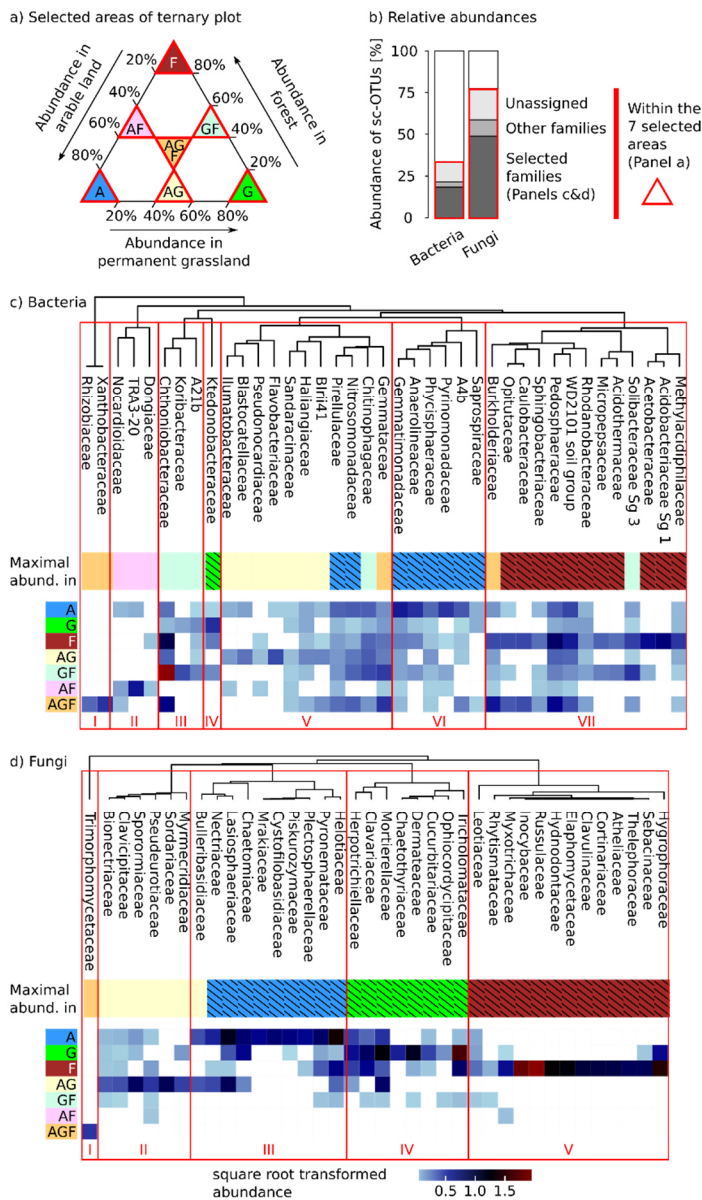

592  
 593 Figure 4: Distribution of most abundant bacterial and fungal families among land-use types.  
 594 Based on the ternary plots (Figure 3) site-core OTUs (sc-OTUs) were selected from seven  
 595 areas (a) corresponding to sc-OTUs with at least 80% of their abundance in a single land-  
 596 use type (A, G, F), with at least 40% in each of two land-use types (AG, GF, AF), or with at  
 597 least 20% in each land-use types (AGF). The proportions of relative abundances covered by  
 598 the selected sc-OTUs, and their assignment at the family level, is shown in panel b). Panels  
 599 c) and d) show the relative abundances of the ten most abundant bacterial (c) and fungal (d)  
 600 families of each area of the ternary plots. Light blue indicates low, dark blue middle, and  
 601 brown high relative abundances. White areas represent absences of families in an area of  
 602 the ternary plot. The area in which a family has its highest abundance is indicated by the  
 603 following color code (Maximal abund.): blue (A), green (G), brown (F), yellow (AG), light  
 604 green (GF), pink (AF), and orange (AGF). Highest abundances in a single land-use type are  
 605 indicated by black hatching. Dendrograms show clustering of normalized relative  
 606 abundances of families in the land-use types and their combinations using average clustering  
 607 (UPGMA). Red boxes highlight clusters of families with similar distributions among land-use  
 608 types.

07-06-2021

609 Tables

610

611 Table 1

612 Definitions of OTU groups and subgroups (see also Table 3)

| OTU group                            | Definition                                                                                        |
|--------------------------------------|---------------------------------------------------------------------------------------------------|
| core OTUs                            |                                                                                                   |
| site-core OTUs (sc-OTUs)             | occur in at least 12 of the 15 samples from a site                                                |
| land-use-core OTUs (lc-OTUs)         | is a sc-OTU in at least 8 of the 10 sites of a land-use type                                      |
| indicative OTUs                      |                                                                                                   |
| environmental-factor-indicative OTUs | correlated to an environmental factor <sup>1)</sup> ( $ \text{Spearman } \rho  > 0.4, p < 0.05$ ) |
| site-indicative OTUs                 | indicative of an individual site ( $\text{IndVal} > 0.8, p < 0.05$ )                              |
| land-use-indicative OTUs             | indicative of individual or combinations of land-use types ( $\text{IndVal} > 0.8, p < 0.05$ )    |

613 <sup>1)</sup> Environmental factors are summarized in Table S1.

614

07-06-2021

615 Table 2  
 616 Site and land-use specific soil microbial communities at different analytical levels. Site and  
 617 land-use type specificity was calculated using a leave-one-out reclassification test based on  
 618 linear discriminant analysis for univariate and canonical analysis of principal coordinates (CAP)  
 619 with 9 999 permutations for community compositions and structures.

| Community parameter            | Taxon    | LUT <sup>1)</sup>      |                        | Site                   |         |
|--------------------------------|----------|------------------------|------------------------|------------------------|---------|
|                                |          | Reclass. <sup>2)</sup> | p-value                | Reclass. <sup>2)</sup> | p-value |
| Organic Carbon                 |          | 60.7%                  | 6.95*10 <sup>-12</sup> | 4.7%                   | 0.235   |
| Microbial biomass              |          |                        |                        |                        |         |
| C <sub>mic</sub> <sup>3)</sup> |          | 60.0%                  | 2.13*10 <sup>-11</sup> | 4.0%                   | 0.384   |
| DNA                            |          | 61.3%                  | 2.20*10 <sup>-12</sup> | 2.0%                   | 0.880   |
| Alpha diversity                |          |                        |                        |                        |         |
| OTU richness                   | Bacteria | 50.7%                  | 8.82*10 <sup>-6</sup>  | 0.7%                   | 0.994   |
| Simpson evenness               | Bacteria | 54.0%                  | 1.57*10 <sup>-7</sup>  | 4.0%                   | 0.384   |
| Inverse Simpson                | Bacteria | 57.3%                  | 1.45*10 <sup>-9</sup>  | 0.7%                   | 0.994   |
| OTU richness                   | Fungi    | 28.0%                  | 0.931                  | 4.7%                   | 0.235   |
| Simpson evenness               | Fungi    | 42.0%                  | 0.016                  | 0.0%                   | 1.000   |
| Inverse Simpson                | Fungi    | 40.7%                  | 0.036                  | 0.0%                   | 1.000   |
| Beta diversity                 |          |                        |                        |                        |         |
| Jaccard similarity             | Bacteria | 100%                   | 0.0001                 | 100%                   | 0.0001  |
| Bray-Curtis dissimilarity      | Bacteria | 100%                   | 0.0001                 | 100%                   | 0.0001  |
| Jaccard similarity             | Fungi    | 100%                   | 0.0001                 | 100%                   | 0.0001  |
| Bray-Curtis dissimilarity      | Fungi    | 100%                   | 0.0001                 | 100%                   | 0.0001  |

620 <sup>1)</sup> LUT = Land-use type

621 <sup>2)</sup> Reclass.: Reclassification success of leave-one-out tests.

622 <sup>3)</sup> C<sub>mic</sub>: carbon content based on chloroform fumigation extraction.

623

07-06-2021

624 Table 3  
 625 Summary of OTU partitioning into core and indicative groups and subgroups. Core and  
 626 indicative OTUs were defined at the site and the land-use type level (see Table 1 for  
 627 definitions of OTU groups and subgroups). LUT = land-use type.

|          | OTU group  | Subgroup             | OTUs [N] | Abundance [%] | Correlation <sup>1)</sup> [rho] | Phyla [N] | Families [N] |
|----------|------------|----------------------|----------|---------------|---------------------------------|-----------|--------------|
| Bacteria | Core       | Site                 | 6 979    | 95.9          | 1.000                           | 31        | 215          |
|          | Core       | LUT                  | 1 136    | 69.1          | 0.995                           | 17        | 119          |
|          | indicative | Environmental factor | 3 103    | 67.0          | 0.983                           | 27        | 164          |
|          | indicative | Site                 | 1 146    | 3.1           | 0.736                           | 28        | 106          |
|          | indicative | LUT                  | 699      | 27.2          | 0.931                           | 17        | 102          |
|          | All        |                      | 18 140   | 100           |                                 | 46        | 320          |
| Fungi    | Core       | Site                 | 2 802    | 93.2          | 0.999                           | 9         | 176          |
|          | Core       | LUT                  | 103      | 29.4          | 0.893                           | 5         | 35           |
|          | indicative | Environmental factor | 553      | 42.5          | 0.942                           | 7         | 96           |
|          | indicative | Site                 | 1 445    | 29.9          | 0.765                           | 7         | 125          |
|          | indicative | LUT                  | 171      | 35.2          | 0.891                           | 5         | 50           |
|          | All        |                      | 8 477    | 100           |                                 | 12        | 304          |

628 <sup>1)</sup> Spearman correlation to entire community (Mantel test)

07-06-2021

629 Table 4  
 630 Effects of environmental factors on bacterial (A) and fungal (B) communities as assessed by  
 631 PERMANOVA. Factors are sorted by their position in the PERMANOVA model with  
 632 environmental factors as covariates. Year and site were random factors with site being  
 633 nested within land-use type. Factors below the dotted lines are categorical. Significance  
 634 codes: \*\*\*  $p < 0.001$ , \*\*  $p < 0.01$ , \*  $p < 0.05$   
 635  
 636

| a) Bacteria               |          |                           |         |     | b) Fungi                  |          |                           |         |     |
|---------------------------|----------|---------------------------|---------|-----|---------------------------|----------|---------------------------|---------|-----|
| Env. factor <sup>1)</sup> | Pseudo-F | $\sqrt{CV}$ <sup>2)</sup> | p-value |     | Env. factor <sup>1)</sup> | Pseudo-F | $\sqrt{CV}$ <sup>2)</sup> | p-value |     |
| pH                        | 18.6     | 0.25                      | 0.0001  | *** | C/N-ratio                 | 5.5      | 0.19                      | 0.0001  | *** |
| C/N-ratio                 | 5.4      | 0.15                      | 0.0001  | *** | pH                        | 2.6      | 0.14                      | 0.0001  | *** |
| MAP <sup>3)</sup>         | 2.2      | 0.07                      | 0.0001  | *** | Elevation                 | 1.5      | 0.09                      | 0.0086  | **  |
| Clay                      | 2.0      | 0.06                      | 0.0001  | *** | Sand                      | 1.3      | 0.06                      | 0.0330  | *   |
| Elevation                 | 1.4      | 0.05                      | 0.0119  | *   | Clay                      | 1.2      | 0.06                      | 0.1399  |     |
| C <sub>org</sub>          | 1.5      | 0.07                      | 0.0130  | *   | MAT <sup>4)</sup>         | 1.2      | 0.06                      | 0.1012  |     |
| Sand                      | 1.3      | 0.06                      | 0.0338  | *   | C <sub>org</sub>          | 1.2      | 0.06                      | 0.1226  |     |
| MAT <sup>4)</sup>         | 1.2      | 0.04                      | 0.1418  |     | Bulk density              | 1.3      | 0.08                      | 0.1061  |     |
| Year                      | 4.2      | 0.05                      | 0.0001  | *** | Year                      | 2.2      | 0.06                      | 0.0001  | *** |
| LUT <sup>5)</sup>         | 2.9      | 0.23                      | 0.0017  | **  | LUT <sup>5)</sup>         | 2.5      | 0.31                      | 0.0001  | *** |
| Site                      | 19.4     | 0.31                      | 0.0001  | *** | Site                      | 14.4     | 0.49                      | 0.0001  | *** |
| LUT <sup>5)</sup> x Year  | 1.5      | 0.04                      | 0.0001  | *** | LUT <sup>5)</sup> x Year  | 1.3      | 0.05                      | 0.0001  | *** |
| Residuals                 |          | 0.15                      |         |     | Residuals                 |          | 0.28                      |         |     |

637 <sup>1)</sup> Env. factor: environmental factor;

638 <sup>2)</sup>  $\sqrt{CV}$ : square root of component of variation, expressed as Bray-Curtis dissimilarity;

639 <sup>3)</sup> MAP: mean annual precipitation

640 <sup>4)</sup> MAT: mean annual temperature

641 <sup>5)</sup> LUT: Land-use type

642

643 Table 5: Number of OTUs, which were indicative (IndVal >0.8, p < 0.05) and core for the  
 644 same land-use types from selected bacterial and fungal families. Families were selected if at  
 645 least four (bacteria) or two (fungi) OTUs were indicative and core for the same land-use type  
 646 or land-use type combination. All families are shown in Table S7 (Bacteria) and S8 (Fungi).  
 647 Associations of families to land-use types are indicated according to Figure 4. Stars indicate  
 648 families, which have the highest number of indicative and lc-OTUs and the highest  
 649 abundance in the same land-use type or land-use type combination.

| Family                      | Indicative and lc-OTUs <sup>1)</sup> (all indicative OTUs) |          |        |      |         |        | Figure 4 |             |   |
|-----------------------------|------------------------------------------------------------|----------|--------|------|---------|--------|----------|-------------|---|
|                             | A                                                          | AG       | G      | AF   | GF      | F      | Cluster  | Main abund. |   |
| <b>Bacteria</b>             |                                                            |          |        |      |         |        |          |             |   |
| Chthoniobacteraceae         | 1(1)                                                       | 4(12)    | 0(1)   | 0(0) | 2(5)    | 3(4)   | III      | GF          |   |
| Pirellulaceae               | 4(5)                                                       | 1(8)     | 0(0)   | 0(0) | 0(2)    | 0(0)   | V        | A           | * |
| Chitinophagaceae            | 4(10)                                                      | 3(12)    | 2(2)   | 0(0) | 1(4)    | 1(3)   | V        | GF          |   |
| Gemmatimonadaceae           | 5(9)                                                       | 3(5)     | 0(0)   | 0(0) | 0(2)    | 1(1)   | VI       | A           | * |
| Anaerolineaceae             | 4(4)                                                       | 0(3)     | 0(0)   | 0(0) | 0(1)    | 0(0)   | VI       | A           | * |
| Pyrinomonadaceae            | 4(4)                                                       | 0(0)     | 0(0)   | 0(0) | 0(1)    | 0(0)   | VI       | A           | * |
| Burkholderiaceae            | 1(2)                                                       | 4(7)     | 0(0)   | 0(0) | 0(1)    | 3(4)   | VII      | AGF         |   |
| Pedosphaeraceae             | 4(5)                                                       | 7(11)    | 3(3)   | 0(0) | 1(12)   | 3(5)   | VII      | F           |   |
| WD2101 soil group           | 2(5)                                                       | 9(18)    | 1(2)   | 0(0) | 1(4)    | 1(5)   | VII      | F           |   |
| Acidobacteriaceae Sg 1      | 0(0)                                                       | 0(0)     | 0(0)   | 0(0) | 0(1)    | 6(8)   | VII      | F           | * |
| Acetobacteraceae            | 0(0)                                                       | 0(0)     | 0(0)   | 0(0) | 2(2)    | 4(6)   | VII      | F           | * |
| Caulobacteraceae            | 0(0)                                                       | 1(1)     | 0(0)   | 0(0) | 0(0)    | 3(5)   | VII      | F           | * |
| Acidothermaceae             | 0(0)                                                       | 0(0)     | 0(0)   | 0(0) | 2(3)    | 2(4)   | VII      | F           | * |
| Solibacteriaceae Sg 3       | 0(0)                                                       | 0(2)     | 0(0)   | 0(0) | 3(12)   | 1(3)   | VII      | GF          | * |
| AKYH767                     | 0(0)                                                       | 4(4)     | 0(0)   | 0(0) | 0(0)    | 0(0)   |          |             |   |
| SC-I-84                     | 1(1)                                                       | 2(4)     | 2(2)   | 0(0) | 0(3)    | 0(0)   |          |             |   |
| Others (incl. unclassified) | 47(75)                                                     | 53(195)  | 12(21) | 0(4) | 28(110) | 17(41) |          |             |   |
| All                         | 86(128)                                                    | 105(287) | 23(29) | 0(4) | 42(162) | 48(89) |          |             |   |
| <b>Fungi</b>                |                                                            |          |        |      |         |        |          |             |   |
| Pseudeurotiaceae            | 0(0)                                                       | 1(1)     | 0(0)   | 0(0) | 0(0)    | 1(1)   | II       | AG          | * |
| Lasio-sphaeriaceae          | 3(4)                                                       | 2(7)     | 0(1)   | 0(0) | 0(0)    | 0(0)   | III      | A           | * |
| Plectosphaerellaceae        | 2(3)                                                       | 1(1)     | 0(0)   | 0(0) | 0(0)    | 0(0)   | III      | A           | * |
| Chaetomiaceae               | 2(2)                                                       | 0(0)     | 0(1)   | 0(0) | 0(0)    | 0(0)   | III      | A           | * |
| Nectriaceae                 | 1(1)                                                       | 3(9)     | 0(0)   | 0(0) | 0(1)    | 0(0)   | III      | A           |   |
| Helotiaceae                 | 0(2)                                                       | 3(4)     | 0(0)   | 0(0) | 0(0)    | 0(1)   | III      | A           |   |
| Mortierellaceae             | 0(0)                                                       | 2(5)     | 1(1)   | 0(0) | 0(0)    | 1(1)   | IV       | G           |   |
| Myxotrichaceae              | 0(0)                                                       | 0(0)     | 0(0)   | 0(0) | 0(0)    | 2(4)   | V        | F           | * |
| Phaeosphaeriaceae           | 1(1)                                                       | 1(1)     | 0(0)   | 0(0) | 0(0)    | 0(0)   |          |             |   |
| Others (incl. unclassified) | 7(35)                                                      | 12(53)   | 5(13)  | 0(2) | 0(0)    | 7(20)  |          |             |   |
| All                         | 16(47)                                                     | 25(79)   | 6(16)  | 0(2) | 0(1)    | 11(26) |          |             |   |

650 <sup>1)</sup> indicative and lc-OTUs: OTUs, which are indicative and core of the same land-use type(s), note that OTUs  
 651 cannot be indicative of all sites, i.e., the combination AGF;

652 <sup>2)</sup> Main abund.: Main abundance in arable land (A), permanent grassland (G), forest (F) or their combinations,  
 653 according to Figure 4.  
 654

## 655 References

- 656 Ai C, Zhang S, Zhang X *et al.* Distinct responses of soil bacterial and fungal communities to  
657 changes in fertilization regime and crop rotation. *Geoderma* 2018;**319**: 156-66.
- 658 Anderson M, Gorley RN, Clarke K. *PERMANOVA+ for primer: Guide to software and*  
659 *statistical methods*, 2008.
- 660 Anderson MJ. A new method for non-parametric multivariate analysis of variance. *Austral*  
661 *Ecology* 2001;**26**: 32-46.
- 662 Anderson MJ, Ellingsen KE, McArdle BH. Multivariate dispersion as a measure of beta  
663 diversity. *Ecology Letters* 2006;**9**: 683-93.
- 664 Anderson MJ, Willis TJ. Canonical analysis of principal coordinates: a useful method of  
665 constrained ordination for ecology. *Ecology* 2003;**84**: 511-25.
- 666 Babin D, Deubel A, Jacquiod S *et al.* Impact of long-term agricultural management practices  
667 on soil prokaryotic communities. *Soil Biology and Biochemistry* 2019;**129**: 17-28.
- 668 Bahmann B, Mašínová T, Halvorsen R *et al.* Effects of oak, beech and spruce on the  
669 distribution and community structure of fungi in litter and soils across a temperate  
670 forest. *Soil Biology and Biochemistry* 2018;**119**: 162-73.
- 671 Bahram M, Hildebrand F, Forslund SK *et al.* Structure and function of the global topsoil  
672 microbiome. *Nature* 2018;**560**: 233-7.
- 673 Banerjee S, Walder F, Büchi L *et al.* Agricultural intensification reduces microbial network  
674 complexity and the abundance of keystone taxa in roots. *ISME J* 2019;**13**: 1722-36.
- 675 Bardgett RD, van der Putten WH. Belowground biodiversity and ecosystem functioning.  
676 *Nature* 2014;**515**: 505.
- 677 Beck S, Anderson IC, Drigo B *et al.* A soil fungal metacommunity perspective reveals  
678 stronger and more localised interactions above the tree line of an alpine/subalpine  
679 ecotone. *Soil Biology and Biochemistry* 2019;**135**: 1-9.
- 680 Benjamini Y, Hochberg Y. Controlling the false discovery rate: A practical and powerful  
681 approach to multiple testing. *Journal of the Royal Statistical Society: Series B*  
682 *(Methodological)* 1995;**57**: 289-300.
- 683 Bürgmann H, Pesaro M, Widmer F *et al.* A strategy for optimizing quality and quantity of DNA  
684 extracted from soil. *Journal of Microbiological Methods* 2001;**45**: 7-20.
- 685 Carini P. A “Cultural” renaissance: Genomics breathes new life into an old craft. *mSystems*  
686 2019;**4**: e00092-19.
- 687 Cavaletti L, Monciardini P, Bamonte R *et al.* New lineage of filamentous, spore-forming,  
688 gram-positive bacteria from soil. *Applied and Environmental Microbiology* 2006;**72**:  
689 4360-9.
- 690 Clarke KR, Warwick RM. *Change in marine communities: an approach to statistical analysis*  
691 *and interpretation, 2nd edition*. PRIMER-E: Plymouth, 2001.
- 692 Costa OYA, Raaijmakers JM, Kuramae EE. Microbial extracellular polymeric substances:  
693 Ecological function and impact on soil aggregation. *Frontiers in Microbiology* 2018;**9**.
- 694 Cui H, Sun W, Delgado-Baquerizo M *et al.* The effects of mowing and multi-level N  
695 fertilization on soil bacterial and fungal communities in a semiarid grassland are year-  
696 dependent. *Soil Biology and Biochemistry* 2020;**151**: 108040.
- 697 De Cáceres M, Legendre P. Associations between species and groups of sites: indices and  
698 statistical inference. *Ecology* 2009;**90**: 3566-74.
- 699 Degruene F, Theodorakopoulos N, Colinet G *et al.* Temporal dynamics of soil microbial  
700 communities below the seedbed under two contrasting tillage regimes. *Frontiers in*  
701 *Microbiology* 2017;**8**.
- 702 Delgado-Baquerizo M. Obscure soil microbes and where to find them. *ISME J* 2019;**13**:  
703 2120-4.
- 704 Delgado-Baquerizo M, Oliverio AM, Brewer TE *et al.* A global atlas of the dominant bacteria  
705 found in soil. *Science* 2018;**359**: 320-5.
- 706 Dequiedt S, Saby NPA, Lelievre M *et al.* Biogeographical patterns of soil molecular microbial  
707 biomass as influenced by soil characteristics and management. *Global Ecology and*  
708 *Biogeography* 2011;**20**: 641-52.

- 709 Edgar RC. Search and clustering orders of magnitude faster than BLAST. *Bioinformatics*  
710 2010;**26**: 2460-1.
- 711 Egidi E, Delgado-Baquerizo M, Plett JM *et al.* A few Ascomycota taxa dominate soil fungal  
712 communities worldwide. *Nature Communications* 2019;**10**: 2369.
- 713 Fox A, Lüscher A, Widmer F. Plant species identity drives soil microbial community  
714 structures that persist under a following crop. *Ecology and Evolution* 2020;**10**: 8652-  
715 68.
- 716 Frey B, Carnol M, Dharmarajah A *et al.* Only minor changes in the soil microbiome of a sub-  
717 alpine forest after 20 years of moderately increased nitrogen loads. *Frontiers in*  
718 *Forests and Global Change* 2020;**3**.
- 719 Frey B, Rime T, Phillips M *et al.* Microbial diversity in European alpine permafrost and active  
720 layers. *FEMS Microbiology Ecology* 2016;**92**.
- 721 Frey B, Walthert L, Perez-Mon C *et al.* Deep soil layers of drought-exposed forests harbor  
722 poorly known bacterial and fungal communities. *Frontiers in Microbiology* 2021;**12**:  
723 1061.
- 724 Gilmullina A, Rumpel C, Blagodatskaya E *et al.* Management of grasslands by mowing  
725 versus grazing – impacts on soil organic matter quality and microbial functioning.  
726 *Applied Soil Ecology* 2020;**156**: 103701.
- 727 Giraldo A, Crous PW. Inside Plectosphaerellaceae. *Studies in Mycology* 2019;**92**: 227-86.
- 728 Glassman SI, Martiny JBH. Broad-scale ecological patterns are robust to use of exact  
729 sequence variants versus operational taxonomic units. *mSphere* 2018;**3**: e00148-18.
- 730 Glassman SI, Wang IJ, Bruns TD. Environmental filtering by pH and soil nutrients drives  
731 community assembly in fungi at fine spatial scales. *Molecular Ecology* 2017;**26**: 6960-  
732 73.
- 733 Griffiths RI, Thomson BC, James P *et al.* The bacterial biogeography of British soils.  
734 *Environmental Microbiology* 2011;**13**: 1642-54.
- 735 Griffiths RI, Thomson BC, Plassart P *et al.* Mapping and validating predictions of soil  
736 bacterial biodiversity using European and national scale datasets. *Applied Soil*  
737 *Ecology* 2016;**97**: 61-8.
- 738 Gschwend F, Aregger K, Gramlich A *et al.* Periodic waterlogging consistently shapes  
739 agricultural soil microbiomes by promoting specific taxa. *Applied Soil Ecology*  
740 2020;**155**: 103623.
- 741 Gschwend F, Braun-Kiewnick A, Widmer F *et al.* Apple blossoms from a Swiss orchard with  
742 low-input plant protection regime reveal high abundance of potential fire blight  
743 antagonists. *Phytobiomes Journal* 2021;**0**: null.
- 744 Gschwend F, Hartmann M, Hug A *et al.* Long-term stability of soil bacterial and fungal  
745 community structures revealed in their abundant and rare fractions.
- 746 Gubler A, Wächter D, Schwab P *et al.* Twenty-five years of observations of soil organic  
747 carbon in Swiss croplands showing stability overall but with some divergent trends.  
748 *Environmental Monitoring and Assessment* 2019;**191**: 277.
- 749 Guerra CA, Heintz-Buschart A, Sikorski J *et al.* Blind spots in global soil biodiversity and  
750 ecosystem function research. *Nature Communications* 2020;**11**: 3870.
- 751 Hallin S, Philippot L, Löffler FE *et al.* Genomics and ecology of novel N<sub>2</sub>O-reducing  
752 microorganisms. *Trends in Microbiology* 2018;**26**: 43-55.
- 753 Hamilton NE, Ferry M. ggtern: Ternary diagrams using ggplot2. *Journal of Statistical*  
754 *Software* 2018;**87**: 1-17.
- 755 Hartmann M, Brunner I, Hagedorn F *et al.* A decade of irrigation transforms the soil  
756 microbiome of a semi-arid pine forest. *Molecular Ecology* 2017;**26**: 1190-206.
- 757 Hartmann M, Frey B, Kölliker R *et al.* Semi-automated genetic analyses of soil microbial  
758 communities: comparison of T-RFLP and RISA based on descriptive and  
759 discriminative statistical approaches. *Journal of Microbiological Methods* 2005;**61**:  
760 349-60.
- 761 Hartmann M, Frey B, Mayer J *et al.* Distinct soil microbial diversity under long-term organic  
762 and conventional farming. *ISME J* 2015;**9**: 1177-94.
- 763 Hartmann M, Niklaus PA, Zimmermann S *et al.* Resistance and resilience of the forest soil  
764 microbiome to logging-associated compaction. *ISME J* 2014;**8**: 226.



- 765 Hemkemeyer M, Christensen BT, Tebbe CC *et al.* Taxon-specific fungal preference for  
766 distinct soil particle size fractions. *European Journal of Soil Biology* 2019;**94**: 103103.
- 767 Hemkemeyer M, Dohrmann AB, Christensen BT *et al.* Bacterial preferences for specific soil  
768 particle size fractions revealed by community analyses. *Frontiers in Microbiology*  
769 2018;**9**.
- 770 Jiao S, Xu Y, Zhang J *et al.* Core microbiota in agricultural soils and their potential  
771 associations with nutrient cycling. *mSystems* 2019;**4**: e00313-18.
- 772 Joergensen RG. The fumigation-extraction method to estimate soil microbial biomass:  
773 Calibration of the kEC value. *Soil Biology and Biochemistry* 1996;**28**: 25-31.
- 774 Jones RT, Robeson MS, Lauber CL *et al.* A comprehensive survey of soil acidobacterial  
775 diversity using pyrosequencing and clone library analyses. *ISME J* 2009;**3**: 442-53.
- 776 Kaiser K, Wemheuer B, Korolkow V *et al.* Driving forces of soil bacterial community structure,  
777 diversity, and function in temperate grasslands and forests. *Scientific Reports* 2016;**6**:  
778 33696.
- 779 Karimi B, Terrat S, Dequiedt S *et al.* Biogeography of soil bacteria and archaea across  
780 France. *Science Advances* 2018;**4**: eaat1808.
- 781 Kielak AM, Barreto CC, Kowalchuk GA *et al.* The ecology of Acidobacteria: Moving beyond  
782 genes and genomes. *Frontiers in Microbiology* 2016;**7**.
- 783 Kindt R, Coe R. *Tree diversity analysis: a manual and software for common statistical*  
784 *methods for ecological and biodiversity studies*. Nairobi: World Agroforestry Centre,  
785 2005.
- 786 Klosterman SJ, Atallah ZK, Vallad GE *et al.* Diversity, pathogenicity, and management of  
787 *Verticillium* species. *Annual Review of Phytopathology* 2009;**47**: 39-62.
- 788 Kuhn M. Building predictive models in R using the caret package. *Journal of statistical*  
789 *software* 2008;**28**: 1-26.
- 790 Lammel DR, Barth G, Ovaskainen O *et al.* Direct and indirect effects of a pH gradient bring  
791 insights into the mechanisms driving prokaryotic community structures. *Microbiome*  
792 2018;**6**: 106.
- 793 Lauber CL, Hamady M, Knight R *et al.* Pyrosequencing-based assessment of soil pH as a  
794 predictor of soil bacterial community structure at the continental scale. *Applied and*  
795 *Environmental Microbiology* 2009;**75**: 5111-20.
- 796 Lazzaro A, Hartmann M, Blaser P *et al.* Bacterial community structure and activity in different  
797 Cd-treated forest soils. *FEMS Microbiology Ecology* 2006;**58**: 278-92.
- 798 Lee MR, Hawkes CV. Plant and soil drivers of whole-plant microbiomes: variation in  
799 switchgrass fungi from coastal to mountain sites. *Phytobiomes Journal* 2020, DOI  
800 10.1094/PBIOMES-07-20-0056-FI: PBIOMES-07-20-0056-FI.
- 801 Leeuwen JPV, Saby NPA, Jones A *et al.* Gap assessment in current soil monitoring networks  
802 across Europe for measuring soil functions. *Environmental Research Letters* 2017;**12**:  
803 124007.
- 804 Leff JW, Bardgett RD, Wilkinson A *et al.* Predicting the structure of soil communities from  
805 plant community taxonomy, phylogeny, and traits. *ISME J* 2018;**12**: 1794-805.
- 806 Liu XZ, Wang QM, Göker M *et al.* Towards an integrated phylogenetic classification of the  
807 Tremellomycetes. *Studies in Mycology* 2015;**81**: 85-147.
- 808 Mayerhofer J, Eckard S, Hartmann M *et al.* Assessing effects of the entomopathogenic  
809 fungus *Metarhizium brunneum* on soil microbial communities in *Agriotes* spp.  
810 biological pest control. *FEMS Microbiology Ecology* 2017;**93**.
- 811 Mayerhofer J, Wächter D, Calanca P *et al.* Environmental and anthropogenic factors shape  
812 major bacterial community types across the complex mountain landscape of  
813 Switzerland. *Frontiers in microbiology* 2021;**12**: 500.
- 814 McArdle BH, Anderson MJ. Fitting multivariate models to community data: a comment on  
815 distance-based redundancy analysis. *Ecology* 2001;**82**: 290-7.
- 816 Nacke H, Thürmer A, Wollherr A *et al.* Pyrosequencing-based assessment of bacterial  
817 community structure along different management types in German forest and  
818 grassland soils. *PLOS ONE* 2011;**6**: e17000.

- 819 Nilsson RH, Larsson K-H, Taylor AF S *et al.* The UNITE database for molecular identification  
820 of fungi: handling dark taxa and parallel taxonomic classifications. *Nucleic Acids*  
821 *Research* 2018;**47**: D259-D64.
- 822 Peralta AL, Sun Y, McDaniel MD *et al.* Crop rotational diversity increases disease  
823 suppressive capacity of soil microbiomes. *Ecosphere* 2018;**9**: e02235.
- 824 Piazza G, Ercoli L, Nuti M *et al.* Interaction between conservation tillage and nitrogen  
825 fertilization shapes prokaryotic and fungal diversity at different soil depths: evidence  
826 from a 23-year field experiment in the mediterranean area. *Frontiers in Microbiology*  
827 2019;**10**.
- 828 Quan Y, Muggia L, Moreno LF *et al.* A re-evaluation of the Chaetothyriales using criteria of  
829 comparative biology. *Fungal Diversity* 2020;**103**: 47-85.
- 830 Quast C, Pruesse E, Yilmaz P *et al.* The SILVA ribosomal RNA gene database project:  
831 improved data processing and web-based tools. *Nucleic Acids Research* 2012;**41**:  
832 D590-D6.
- 833 R Core Team. R: A language and environment for statistical computing [Computer software  
834 manual]. Vienna, Austria. URL <https://www.R-project.org/>. 2016.
- 835 Rice AV, Currah RS. *Oidiodendron*: A survey of the named species and related anamorphs  
836 of *Myxotrichum*. *Studies in Mycology* 2005;**53**: 83-120.
- 837 Rivera-Becerril F, van Tuinen D, Chatagnier O *et al.* Impact of a pesticide cocktail  
838 (fenhexamid, folpel, deltamethrin) on the abundance of Glomeromycota in two  
839 agricultural soils. *Science of The Total Environment* 2017;**577**: 84-93.
- 840 RStudio. RStudio: integrated development for R. *RStudio, Inc, Boston, MA* URL [http://www](http://www.rstudio.com)  
841 [rstudio.com](http://www.rstudio.com) 2015;**42**: 14.
- 842 Schloss PD, Westcott SL, Ryabin T *et al.* Introducing mothur: open-source, platform-  
843 independent, community-supported software for describing and comparing microbial  
844 communities. *Applied and Environmental Microbiology* 2009;**75**: 7537-41.
- 845 Steen AD, Crits-Christoph A, Carini P *et al.* High proportions of bacteria and archaea across  
846 most biomes remain uncultured. *ISME J* 2019;**13**: 3126-30.
- 847 Talbot JM, Bruns TD, Taylor JW *et al.* Endemism and functional convergence across the  
848 North American soil mycobiome. *Proceedings of the National Academy of Sciences*  
849 2014;**111**: 6341-6.
- 850 Tedersoo L, Bahram M, Pölme S *et al.* Global diversity and geography of soil fungi. *Science*  
851 2014;**346**: 1256688.
- 852 Tedersoo L, Bahram M, Puusepp R *et al.* Novel soil-inhabiting clades fill gaps in the fungal  
853 tree of life. *Microbiome* 2017;**5**: 42.
- 854 Vance ED, Brookes PC, Jenkinson DS. An extraction method for measuring soil microbial  
855 biomass C. *Soil Biology and Biochemistry* 1987;**19**: 703-7.
- 856 Větrovský T, Kohout P, Kopecký M *et al.* A meta-analysis of global fungal distribution reveals  
857 climate-driven patterns. *Nature Communications* 2019;**10**: 5142.
- 858 Walsh CM, Gebert MJ, Delgado-Baquerizo M *et al.* A global survey of mycobacterial diversity  
859 in soil. *Applied and Environmental Microbiology* 2019;**85**: e01180-19.
- 860 Wisnoski NI, Lennon JT. Microbial community assembly in a multi-layer dendritic  
861 metacommunity. *Oecologia* 2021;**195**: 13-24.
- 862

863 **Supplements**

- 864 1) Supplementary results  
865 2) Supplementary Figures and Tables

866  
867 Supplementary results:  
868 *Sequence data overview:*

869 In total, 9 020 192 bacterial and 11 958 695 fungal high-quality sequences were obtained with  
870 at least 11 791 bacterial and 7 719 fungal sequences per sample and on average 20 045  
871 (standard deviation:  $\pm 3 705$ ) bacterial and 26 575 ( $\pm 8 780$ ) fungal sequences per sample.  
872 The average Good's coverages were 0.92 ( $\pm 0.022$ ) for bacteria and 0.98 ( $\pm 0.005$ ) for fungi.  
873 Sequences were grouped into 18 140 bacterial OTUs (bOTU) and 8 477 fungal OTUs (fOTU)  
874 with an average of 2 714 ( $\pm 658$ ) bOTUs and 562 ( $\pm 134$ ) fOTUs per sample. Bacterial OTUs  
875 were assigned to 46 phyla, of which 31 occurred in core communities (Table S9) and fungal  
876 OTUs to 12 phyla of which 9 occurred in core communities (Table S10).

877  
878  
879  
880

881 Supplementary Figures and Tables

882

883 Supplementary figures

884

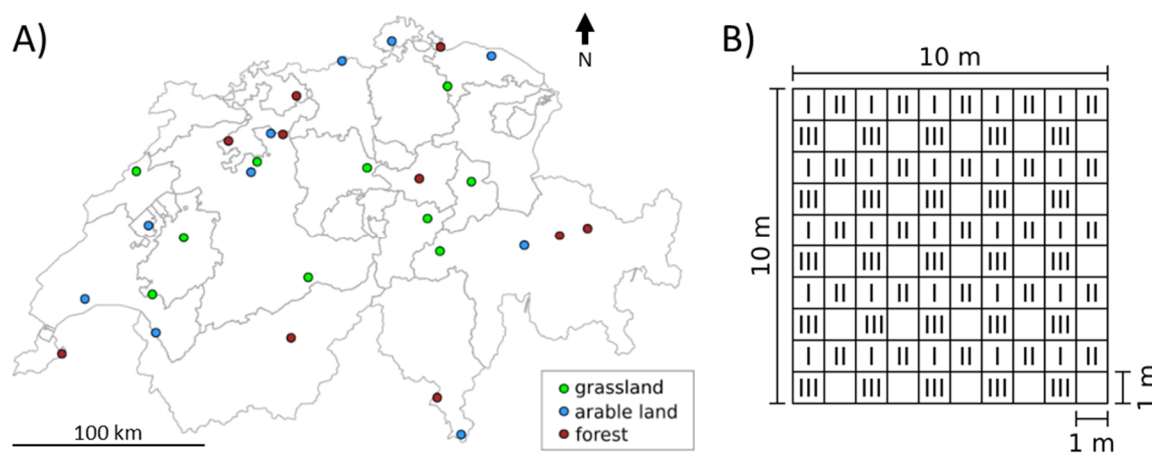

885

886 Figure S1: Map of Switzerland showing the thirty sampling sites and their land-use type (A). At  
887 each site three composite samples (I – III) were taken within a 10 m x 10 m area (B). Each  
888 composite sample was composed of 25 cores of 2.5 cm diameter and 20 cm depth. In each  
889 square meter marked with I to III, one core was randomly taken and mixed with other cores of  
890 the same number.

891

892

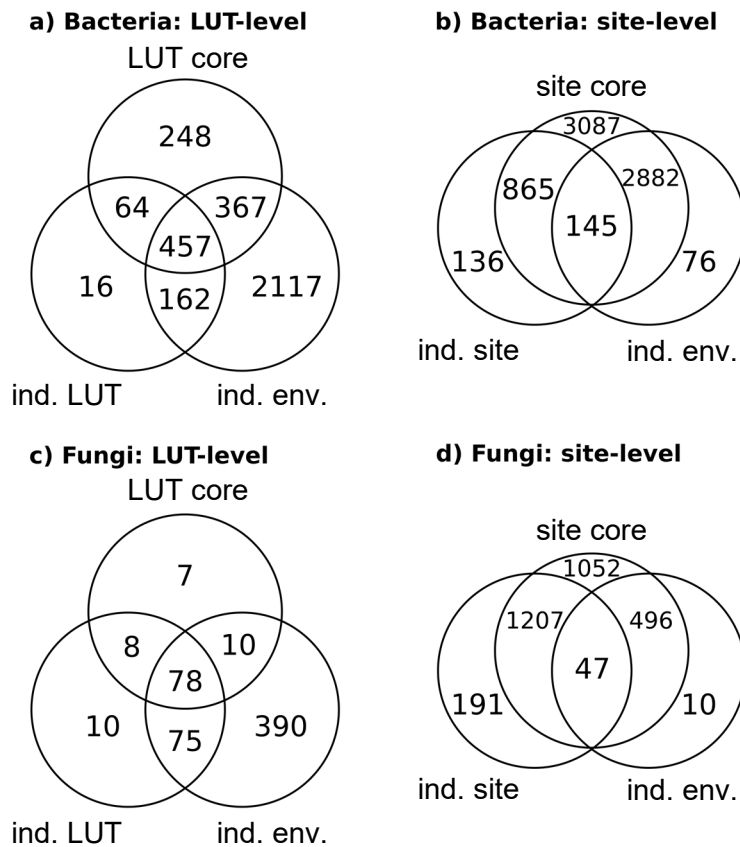

893

894 Figure S2: Venn diagram depicting the OTUs that are shared between different OTU  
895 partitions. Bacterial (a, b) and fungal (c, d) OTU partitions are shown. Indicative and core  
896 OTUs were defined at two levels, i.e., land-use type (a, c) and site (b, d). Site core (sc) OTUs  
897 were defined as OTUs occurring in at least 80% of samples from a site, land-use type (LUT)  
898 cores (lc) as OTUs that were site cores of at least 80% of the sites from a land-use type.  
899 Indicative (ind.) OTUs were based on indicator species analysis ( $\text{IndVal} > 0.8$ ), and  
900 environmental-factor-indicative-OTUs represent OTUs that revealed correlations to an  
901 environmental factor ( $|\text{rho}| > 0.4$ ).

902 Table S1: Summary of environmental factors and alpha diversity at the ten sites of each land-use type.

|                                                                   | Arable land |        |        | Grassland |        |        | Forest |        |        | ANOVA <sup>1)</sup> |          |                       |
|-------------------------------------------------------------------|-------------|--------|--------|-----------|--------|--------|--------|--------|--------|---------------------|----------|-----------------------|
|                                                                   | mean        | min    | max    | mean      | min    | max    | mean   | min    | max    | F                   | p-value  | Pattern <sup>2)</sup> |
| Site characteristics                                              |             |        |        |           |        |        |        |        |        |                     |          |                       |
| Elevation [masl]                                                  | 499.5       | 336.0  | 830.0  | 883.3     | 431.0  | 1915.0 | 967.6  | 505.0  | 1655.0 | 4.8                 | 0.0165   | A<G=F                 |
| Clay [%]                                                          | 25.0        | 5.8    | 59.0   | 25.5      | 12.5   | 35.0   | 23.1   | 7.0    | 42.0   | 0.1                 | 0.8943   | A=G=F                 |
| Silt [%]                                                          | 42.7        | 30.0   | 59.8   | 38.9      | 27.0   | 55.0   | 36.1   | 18.6   | 52.0   | 1.0                 | 0.3993   | A=G=F                 |
| Sand [%]                                                          | 32.3        | 11.0   | 54.0   | 35.5      | 12.0   | 50.8   | 40.8   | 17.5   | 71.0   | 0.7                 | 0.4927   | A=G=F                 |
| Soil skeleton [%]                                                 | 2.4         | 0.0    | 4.9    | 2.8       | 0.0    | 11.3   | 3.9    | 0.0    | 11.2   | 0.6                 | 0.5640   | A=G=F                 |
| MAT <sup>3)</sup> [°C]                                            | 8.9         | 3.9    | 11.0   | 5.4       | -2.3   | 11.0   | 7.7    | 0.2    | 12.3   | 2.5                 | 0.1023   | A=G=F                 |
| MAP <sup>4)</sup> [mm]                                            | 1154.2      | 905.0  | 1838.0 | 1510.4    | 1090.0 | 1979.0 | 1191.3 | 528.0  | 2140.0 | 2.9                 | 0.0711   | A=G=F                 |
| Yearly measurements                                               |             |        |        |           |        |        |        |        |        |                     |          |                       |
| pH                                                                | 6.6         | 5.6    | 7.5    | 5.2       | 3.8    | 6.3    | 4.8    | 3.3    | 6.9    | 10.6                | 0.0004   | A>G=F                 |
| C <sub>tot</sub> [%]                                              | 2.4         | 1.1    | 4.5    | 4.1       | 2.6    | 7.0    | 7.3    | 2.4    | 18.3   | 7.7                 | 0.0023   | A=G<F                 |
| C <sub>org</sub> [%]                                              | 2.2         | 1.1    | 3.4    | 4.1       | 2.6    | 7.0    | 7.3    | 2.4    | 18.3   | 8.3                 | 0.0015   | A=G<F                 |
| N <sub>tot</sub> [%]                                              | 0.2         | 0.1    | 0.5    | 0.4       | 0.3    | 0.7    | 0.4    | 0.2    | 1.1    | 3.2                 | 0.0549   | A=G=F                 |
| C/N                                                               | 9.0         | 6.7    | 11.2   | 9.6       | 7.4    | 12.5   | 17.8   | 11.3   | 27.5   | 40.0                | < 0.0001 | A=G<F                 |
| Bulk density [kg dm <sup>-3</sup> ]                               | 1.2         | 0.6    | 1.5    | 1.0       | 0.7    | 1.2    | 0.7    | 0.2    | 1.2    | 14.9                | < 0.0001 | A>G>F                 |
| C <sub>mic</sub> [mg C kg(dry soil) <sup>-1</sup> ] <sup>5)</sup> | 647.5       | 229.9  | 1247.0 | 1574.1    | 986.4  | 2521.5 | 2266.4 | 563.6  | 7727.3 | 9.6                 | 0.0007   | A<G=F                 |
| DNA [mg kg <sup>-1</sup> ]                                        | 21.2        | 12.3   | 41.7   | 41.4      | 18.0   | 70.0   | 50.2   | 15.0   | 127.0  | 10.8                | 0.0004   | A<G=F                 |
| Bacteria                                                          |             |        |        |           |        |        |        |        |        |                     |          |                       |
| OTU richness                                                      | 2405.3      | 1653.9 | 3036.3 | 2295.4    | 1347.3 | 2768.2 | 1833.1 | 1112.8 | 2735.2 | 5.5                 | 0.0096   | A=G>F                 |
| Simpson evenness                                                  | 0.156       | 0.062  | 0.203  | 0.108     | 0.029  | 0.224  | 0.082  | 0.012  | 0.165  | 11.8                | 0.0002   | A>G=F                 |
| Inverse Simpson                                                   | 377.0       | 116.5  | 561.7  | 253.4     | 69.0   | 568.3  | 151.8  | 21.6   | 428.7  | 13.2                | 0.0001   | A>G=F                 |
| Fungi                                                             |             |        |        |           |        |        |        |        |        |                     |          |                       |
| OTU richness                                                      | 400.7       | 277.8  | 553.9  | 426.0     | 219.8  | 730.9  | 406.6  | 282.2  | 625.9  | 0.4                 | 0.6853   | A=G=F                 |
| Simpson evenness                                                  | 0.096       | 0.023  | 0.185  | 0.083     | 0.012  | 0.180  | 0.050  | 0.008  | 0.105  | 7.5                 | 0.0026   | A=G>F                 |
| Inverse Simpson                                                   | 39.3        | 8.3    | 96.3   | 37.4      | 4.2    | 90.5   | 20.3   | 2.7    | 47.6   | 5.5                 | 0.0100   | A=G>F                 |

903 <sup>1)</sup> One-way ANOVA for site characteristics, ANOVA with repeated measurement design including site as a random factor for yearly measured properties;904 <sup>2)</sup> Significant differences of pairwise tests between land-use types ( $p < 0.05$ ): A - arable land, G - grassland, F - forest;905 <sup>3)</sup> MAT: mean annual temperature;906 <sup>4)</sup> MAP: mean annual precipitation;907 <sup>5)</sup> C<sub>mic</sub>: microbial carbon (carbon content based on chloroform fumigation extraction).

07-06-2021

908 Table S2: Spearman correlations of entire communities with those composed of site-core  
909 OTUs (sc-OTUs). OTUs being detected in at least 12 of the 15 samples from a site were  
910 classified as sc-OTUs.

|                  | Bacteria |           | Fungi |           |
|------------------|----------|-----------|-------|-----------|
|                  | rho      | p-value   | rho   | p-value   |
| Alpha-diversity  |          |           |       |           |
| OTU richness     | 0.99     | < 2.2e-16 | 0.97  | < 2.2e-16 |
| Simpson evenness | 1.00     | < 2.2e-16 | 0.98  | < 2.2e-16 |
| Inverse Simpson  | 1.00     | < 2.2e-16 | 0.98  | < 2.2e-16 |
| Beta diversity   |          |           |       |           |
| Jaccard          | 1.00     | 0.0001    | 1.00  | 0.0001    |
| Bray-Curtis      | 1.00     | 0.0001    | 1.00  | 0.0001    |

911

07-06-2021

912 Table S3: Environmental influences on bacterial communities in three land-use types as  
 913 assessed by nested PERMANOVA. Model selection used AICc as selection criteria.

| Arable land       |                  |                          | Grassland         |                  |                          | Forest            |                  |                          |
|-------------------|------------------|--------------------------|-------------------|------------------|--------------------------|-------------------|------------------|--------------------------|
| Factor            | PF <sup>1)</sup> | $\sqrt{CV}^{2)}$ p-value | Factor            | PF <sup>1)</sup> | $\sqrt{CV}^{2)}$ p-value | Factor            | PF <sup>1)</sup> | $\sqrt{CV}^{2)}$ p-value |
| pH                | 7.3              | 0.18 0.0001              | pH                | 8.3              | 0.21 0.0001              | pH                | 7.2              | 0.27 0.0001              |
| MAT <sup>3)</sup> | 3.0              | 0.12 0.0001              | C <sub>org</sub>  | 3.0              | 0.11 0.0001              | Clay              | 1.8              | 0.11 0.0401              |
| Soil skeleton     | 1.9              | 0.07 0.0001              | MAT <sup>3)</sup> | 1.6              | 0.11 0.0077              | MAP <sup>4)</sup> | 1.5              | 0.12 0.1326              |
| C <sub>org</sub>  | 1.6              | 0.07 0.0003              | Clay              | 1.4              | 0.07 0.0302              | Year              | 1.9              | 0.05 0.0001              |
| Silt              | 1.2              | 0.05 0.0760              | C/N-ratio         | 1.6              | 0.06 0.0123              | Site              | 24.7             | 0.34 0.0001              |
| Year              | 1.9              | 0.06 0.0001              | Year              | 3.0              | 0.07 0.0001              | Residuals         | 0.15             |                          |
| Crop              | 1.6              | 0.08 0.0002              | Site              | 10.3             | 0.23 0.0001              |                   |                  |                          |
| Site              | 5.3              | 0.21 0.0001              | Residuals         | 0.14             |                          |                   |                  |                          |
| Residuals         |                  | 0.16                     |                   |                  |                          |                   |                  |                          |

914 <sup>1)</sup> PF: Pseudo-F;

915 <sup>2)</sup>  $\sqrt{CV}$ : square root of component of variation;

916 <sup>3)</sup> MAT: mean annual temperature;

917 <sup>4)</sup> MAP: Mean annual precipitation.



07-06-2021

918 Table S4: Environmental influences on fungal communities in three land-use types as  
 919 assessed by nested PERMANOVA. Model selection used AICc as selection criteria.

| Factor    | Arable land      |                  |         | Grassland        |                  |             | Forest  |           |                  |                  |         |
|-----------|------------------|------------------|---------|------------------|------------------|-------------|---------|-----------|------------------|------------------|---------|
|           | PF <sup>1)</sup> | $\sqrt{CV}^{2)}$ | p-value | Factor           | PF <sup>1)</sup> | $\sqrt{CV}$ | p-value | Factor    | PF <sup>1)</sup> | $\sqrt{CV}^{2)}$ | p-value |
| pH        | 1.7              | 0.11             | 0.0050  | pH               | 4.5              | 0.23        | 0.0001  | pH        | 1.4              | 0.13             | 0.2000  |
| Year      | 1.4              | 0.08             | 0.0025  | Altitude         | 2.3              | 0.20        | 0.0009  | Site      | 13.6             | 0.59             | 0.0001  |
| Crop      | 1.5              | 0.15             | 0.0007  | Clay             | 1.5              | 0.09        | 0.0553  | Residuals |                  | 0.36             |         |
| Site      | 6.6              | 0.38             | 0.0001  | Soil skeleton    | 1.3              | 0.09        | 0.1192  |           |                  |                  |         |
| Residuals |                  | 0.31             |         | C <sub>org</sub> | 1.6              | 0.18        | 0.0413  |           |                  |                  |         |
|           |                  |                  |         | Year             | 2.3              | 0.09        | 0.0001  |           |                  |                  |         |
|           |                  |                  |         | Site             | 10.2             | 0.38        | 0.0001  |           |                  |                  |         |
|           |                  |                  |         | Residuals        |                  | 0.23        |         |           |                  |                  |         |

920 <sup>1)</sup> PF: Pseudo-F;

921 <sup>2)</sup>  $\sqrt{CV}$ : square root of component of variation.

922 Table S5: Bacterial OTUs with the strongest negative and positive correlations to an  
 923 environmental factor along with their taxonomic assignment. The 20 strongest correlations  
 924 are shown for negative and positive correlations.

|                       | OTUID      | Factor <sup>1)</sup> | Rho            | Phylum           | Class                 | Order                 | Family                   | Genus                          |
|-----------------------|------------|----------------------|----------------|------------------|-----------------------|-----------------------|--------------------------|--------------------------------|
| positively correlated | bOTU 57    | pH                   | 0.91           | Acidobacteria    | Sg 6                  | unclassified          | unclassified             | unclassified                   |
|                       | bOTU 16256 | pH                   | 0.90           | Acidobacteria    | Sg 6                  | unclassified          | unclassified             | unclassified                   |
|                       | bOTU 547   | pH                   | 0.90           | Acidobacteria    | Sg 6                  | unclassified          | unclassified             | unclassified                   |
|                       | bOTU 214   | pH                   | 0.89           | Proteobacteria   | Gammaproteobacteria   | Steroidobacteriales   | Steroidobacteraceae      | unclassified                   |
|                       | bOTU 4698  | pH                   | 0.89           | Acidobacteria    | Sg 6                  | unclassified          | unclassified             | unclassified                   |
|                       | bOTU 144   | pH                   | 0.88           | Bacteroidetes    | Bacteroidia           | Cytophagales          | Microscillaceae          | <i>Chryseolinea</i>            |
|                       | bOTU 65    | pH                   | 0.88           | Acidobacteria    | Sg 6                  | unclassified          | unclassified             | unclassified                   |
|                       | bOTU 487   | pH                   | 0.88           | Acidobacteria    | Sg 6                  | unclassified          | unclassified             | unclassified                   |
|                       | bOTU 240   | pH                   | 0.87           | Proteobacteria   | Gammaproteobacteria   | Betaproteobacteriales | Nitrosomonadaceae        | Ellin6067                      |
|                       | bOTU 223   | pH                   | 0.87           | Bacteroidetes    | Bacteroidia           | Cytophagales          | Microscillaceae          | unclassified                   |
|                       | bOTU 2023  | pH                   | 0.86           | Acidobacteria    | Blastocatellia (Sg 4) | Blastocatellales      | Blastocatellaceae        | <i>Stenotrophobacter</i>       |
|                       | bOTU 647   | pH                   | 0.86           | Chloroflexi      | Anaerolineae          | SBR1031               | A4b                      | unclassified                   |
|                       | bOTU 682   | pH                   | 0.86           | Acidobacteria    | Sg 6                  | unclassified          | unclassified             | unclassified                   |
|                       | bOTU 114   | pH                   | 0.86           | Acidobacteria    | Sg 6                  | unclassified          | unclassified             | unclassified                   |
|                       | bOTU 4     | pH                   | 0.86           | Acidobacteria    | Blastocatellia (Sg 4) | Blastocatellales      | Blastocatellaceae        | unclassified                   |
|                       | bOTU 120   | pH                   | 0.86           | Verrucomicrobia  | Verrucomicrobiae      | Verrucomicrobiales    | Verrucomicrobiaceae      | unclassified                   |
|                       | bOTU 7542  | pH                   | 0.86           | Bacteroidetes    | Bacteroidia           | Chitinophagales       | Chitinophagaceae         | <i>Terrimonas</i>              |
| bOTU 299              | pH         | 0.85                 | Acidobacteria  | Sg 6             | unclassified          | unclassified          | unclassified             |                                |
| bOTU 391              | pH         | 0.85                 | Actinobacteria | Thermoleophila   | Gaiellales            | Gaiellaceae           | <i>Gaiella</i>           |                                |
| bOTU 96               | pH         | 0.85                 | Planctomycetes | Planctomycetacia | Pirellulales          | Pirellulaceae         | <i>Pirellula</i>         |                                |
| negatively correlated | bOTU 596   | pH                   | -0.82          | Verrucomicrobia  | Verrucomicrobiae      | S-BQ2-57 soil group   | unclassified             | unclassified                   |
|                       | bOTU 5377  | pH                   | -0.82          | Acidobacteria    | Acidobacteriia        | Solibacterales        | Solibacteraceae (Sg 3)   | <i>Bryobacter</i>              |
|                       | bOTU 9645  | pH                   | -0.82          | Acidobacteria    | Acidobacteriia        | Acidobacteriales      | unclassified             | unclassified                   |
|                       | bOTU 215   | pH                   | -0.82          | Proteobacteria   | Deltaproteobacteria   | RCP2-54               | unclassified             | unclassified                   |
|                       | bOTU 961   | pH                   | -0.83          | Acidobacteria    | Acidobacteriia        | Solibacterales        | Solibacteraceae (Sg 3)   | <i>Bryobacter</i>              |
|                       | bOTU 60    | pH                   | -0.83          | Acidobacteria    | Acidobacteriia        | Sg 2                  | unclassified             | unclassified                   |
|                       | bOTU 712   | pH                   | -0.83          | Proteobacteria   | Alphaproteobacteria   | Micropepsales         | Micropepsaceae           | unclassified                   |
|                       | bOTU 71    | pH                   | -0.83          | Verrucomicrobia  | Verrucomicrobiae      | Pedosphaerales        | Pedosphaeraceae          | unclassified                   |
|                       | bOTU 50    | pH                   | -0.84          | Acidobacteria    | Acidobacteriia        | Sg 2                  | unclassified             | unclassified                   |
|                       | bOTU 514   | pH                   | -0.84          | Proteobacteria   | Gammaproteobacteria   | Incertae sedis        | unknown family           | <i>Acidibacter</i>             |
|                       | bOTU 163   | pH                   | -0.84          | Acidobacteria    | Acidobacteriia        | Acidobacteriales      | Koribacteraceae          | Cand. <sup>3)</sup> Koribacter |
|                       | bOTU 1665  | pH                   | -0.84          | Verrucomicrobia  | Verrucomicrobiae      | Pedosphaerales        | Pedosphaeraceae          | unclassified                   |
|                       | bOTU 70    | pH                   | -0.84          | Proteobacteria   | Alphaproteobacteria   | Rhizobiales           | Beijerinckiaceae         | <i>Roseiarcus</i>              |
|                       | bOTU 44    | pH                   | -0.84          | Verrucomicrobia  | Verrucomicrobiae      | Chthoniobacterales    | Xiphinematobacteraceae   | Cand. Xiphinematobacter        |
|                       | bOTU 452   | pH                   | -0.85          | Planctomycetes   | Phycisphaerae         | Tepidisphaerales      | WD2101 soil group        | unclassified                   |
|                       | bOTU 15161 | pH                   | -0.86          | Acidobacteria    | Acidobacteriia        | Acidobacteriales      | Acidobacteriaceae (Sg 1) | <i>Occallatibacter</i>         |
|                       | bOTU 1433  | pH                   | -0.87          | Acidobacteria    | Acidobacteriia        | Acidobacteriales      | Koribacteraceae          | Cand. <sup>3)</sup> Koribacter |
|                       | bOTU 283   | pH                   | -0.87          | Acidobacteria    | Acidobacteriia        | Acidobacteriales      | unclassified             | unclassified                   |
|                       | bOTU 396   | pH                   | -0.88          | Acidobacteria    | Acidobacteriia        | Acidobacteriales      | unclassified             | unclassified                   |
|                       | bOTU 9919  | pH                   | -0.88          | Acidobacteria    | Acidobacteriia        | Sg <sup>2)</sup> 2    | unclassified             | unclassified                   |
| bOTU 151              | pH         | -0.88                | Actinobacteria | Actinobacteria   | Frankiales            | Acidotherrmaceae      | <i>Acidotherrmus</i>     |                                |
| bOTU 35               | pH         | -0.92                | Acidobacteria  | Acidobacteriia   | Acidobacteriales      | unclassified          | unclassified             |                                |

925 <sup>1)</sup> Environmental factors include: altitude, clay, silt, sand, soil skeleton, soil pH, total and  
 926 organic carbon, total nitrogen, C/N-ratio, bulk density, mean annual temperature and mean  
 927 annual precipitation;

928 <sup>2)</sup> Sg: subgroup;

929 <sup>3)</sup> Cand. Candidatus.

07-06-2021

930 Table S6: Fungal OTUs with the strongest negative and positive correlations to an  
 931 environmental factor along with their taxonomic assignment. The 20 strongest correlations  
 932 are shown for negative and positive correlations.

|                       | OTUID        | Factor <sup>1)</sup> | Rho        | Phylum            | Class              | Order                         | Family               | Genus                   |
|-----------------------|--------------|----------------------|------------|-------------------|--------------------|-------------------------------|----------------------|-------------------------|
| positively correlated | fOTU 228     | C/N                  | 0.75       | Ascomycota        | Leotiomycetes      | Helotiales                    | Myxotrichaceae       | <i>Oidiodendron</i>     |
|                       | fOTU 647     | pH                   | 0.74       | Ascomycota        | unclassified       | unclassified                  | unclassified         | unclassified            |
|                       | fOTU 1017    | C/N                  | 0.73       | Basidiomycota     | Microbotryomycetes | Leucosporidiales              | unclassified         | unclassified            |
|                       | fOTU 1091    | C/N                  | 0.72       | Ascomycota        | Leotiomycetes      | Helotiales                    | Myxotrichaceae       | <i>Oidiodendron</i>     |
|                       | fOTU 361     | C/N                  | 0.71       | Ascomycota        | Saccharomycetes    | Saccharomycetales             | unclassified         | unclassified            |
|                       | fOTU 365     | pH                   | 0.71       | Ascomycota        | Dothideomycetes    | Pleosporales                  | Phaeosphaeriaceae    | unclassified            |
|                       | fOTU 7764    | C/N                  | 0.69       | Ascomycota        | Leotiomycetes      | Thelebolales                  | Pseudeurotiaceae     | <i>Geomyces</i>         |
|                       | fOTU 12      | pH                   | 0.69       | Ascomycota        | Leotiomycetes      | Helotiales                    | Helotiaceae          | <i>Tetracladium</i>     |
|                       | fOTU 2496    | C/N                  | 0.69       | Ascomycota        | Eurotiomycetes     | Chaetothyriales               | Herpotrichiellaceae  | <i>Cladophialophora</i> |
|                       | fOTU 10774   | C/N                  | 0.69       | Mortierellomycota | Mortierellomycetes | Mortierellales                | Mortierellaceae      | <i>Mortierella</i>      |
|                       | fOTU 12      | Bulk density         | 0.68       | Ascomycota        | Leotiomycetes      | Helotiales                    | Helotiaceae          | <i>Tetracladium</i>     |
|                       | fOTU 354     | C/N                  | 0.67       | Ascomycota        | Eurotiomycetes     | Chaetothyriales               | Herpotrichiellaceae  | <i>Cladophialophora</i> |
|                       | fOTU 718     | C/N                  | 0.65       | Ascomycota        | unclassified       | unclassified                  | unclassified         | unclassified            |
|                       | fOTU 1804    | C/N                  | 0.65       | Ascomycota        | Leotiomycetes      | Helotiales                    | Vibrissaceae         | <i>Phialocephala</i>    |
|                       | fOTU 183     | pH                   | 0.65       | Ascomycota        | Sordariomycetes    | Sordariales                   | Lasiochaeraceae      | <i>Podospira</i>        |
|                       | fOTU 236     | C/N                  | 0.65       | Ascomycota        | Leotiomycetes      | Helotiales                    | Helotiaceae          | <i>Meliniomyces</i>     |
|                       | fOTU 39      | Bulk density         | 0.65       | Ascomycota        | Sordariomycetes    | Sordariales                   | Chaetomiaceae        | unclassified            |
| fOTU 70               | Bulk density | 0.64                 | Ascomycota | Sordariomycetes   | Glomerellales      | Plectosphaerellaceae          | <i>Gibellulopsis</i> |                         |
| fOTU 764              | C/N          | 0.64                 | Ascomycota | Leotiomycetes     | Helotiales         | Myxotrichaceae                | <i>Oidiodendron</i>  |                         |
| fOTU 441              | C/N          | 0.64                 | Ascomycota | Leotiomycetes     | Helotiales         | Helotiales i.s. <sup>2)</sup> | <i>Cadophora</i>     |                         |
| negatively correlated | fOTU 79      | C/N                  | -0.65      | Ascomycota        | Sordariomycetes    | Myrmecridiales                | Myrmecridiaceae      | <i>Myrmecridium</i>     |
|                       | fOTU 36      | Corg                 | -0.65      | Ascomycota        | Sordariomycetes    | Hypocreales                   | Nectriaceae          | unclassified            |
|                       | fOTU 803     | Corg                 | -0.65      | Ascomycota        | Sordariomycetes    | Glomerellales                 | Plectosphaerellaceae | <i>Plectosphaerella</i> |
|                       | fOTU 20      | Corg                 | -0.65      | Ascomycota        | Leotiomycetes      | Helotiales                    | Helotiaceae          | <i>Tetracladium</i>     |
|                       | fOTU 1091    | Bulk density         | -0.65      | Ascomycota        | Leotiomycetes      | Helotiales                    | Myxotrichaceae       | <i>Oidiodendron</i>     |
|                       | fOTU 147     | C/N                  | -0.66      | Ascomycota        | unclassified       | unclassified                  | unclassified         | unclassified            |
|                       | fOTU 56      | C/N                  | -0.66      | Ascomycota        | Sordariomycetes    | Glomerellales                 | Plectosphaerellaceae | <i>Plectosphaerella</i> |
|                       | fOTU 1898    | Corg                 | -0.66      | Ascomycota        | Sordariomycetes    | Sordariales                   | Lasiochaeraceae      | unclassified            |
|                       | fOTU 122     | C/N                  | -0.67      | Ascomycota        | Leotiomycetes      | Thelebolales                  | Pseudeurotiaceae     | <i>Pseudeurotium</i>    |
|                       | fOTU 1898    | Ctot                 | -0.67      | Ascomycota        | Sordariomycetes    | Sordariales                   | Lasiochaeraceae      | unclassified            |
|                       | fOTU 12      | Corg                 | -0.67      | Ascomycota        | Leotiomycetes      | Helotiales                    | Helotiaceae          | <i>Tetracladium</i>     |
|                       | fOTU 12      | C/N                  | -0.68      | Ascomycota        | Leotiomycetes      | Helotiales                    | Helotiaceae          | <i>Tetracladium</i>     |
|                       | fOTU 26      | C/N                  | -0.68      | Ascomycota        | Sordariomycetes    | Hypocreales                   | Nectriaceae          | <i>Fusarium</i>         |
|                       | fOTU 4641    | C/N                  | -0.68      | Mortierellomycota | Mortierellomycetes | Mortierellales                | Mortierellaceae      | <i>Mortierella</i>      |
|                       | fOTU 39      | Corg                 | -0.68      | Ascomycota        | Sordariomycetes    | Sordariales                   | Chaetomiaceae        | unclassified            |
|                       | fOTU 164     | C/N                  | -0.69      | Ascomycota        | Sordariomycetes    | Sordariales                   | Lasiochaeraceae      | unclassified            |
|                       | fOTU 70      | Corg                 | -0.69      | Ascomycota        | Sordariomycetes    | Glomerellales                 | Plectosphaerellaceae | <i>Gibellulopsis</i>    |
| fOTU 62               | C/N          | -0.69                | Ascomycota | Sordariomycetes   | Hypocreales        | Bionectriaceae                | <i>Clonostachys</i>  |                         |
| fOTU 20               | C/N          | -0.69                | Ascomycota | Leotiomycetes     | Helotiales         | Helotiaceae                   | <i>Tetracladium</i>  |                         |
| fOTU 14               | C/N          | -0.71                | Ascomycota | Sordariomycetes   | Sordariales        | Sordariaceae                  | unclassified         |                         |

933 <sup>1)</sup> environmental factors include: altitude, clay, silt, sand, soil skeleton, soil pH, total and  
 934 organic carbon, total nitrogen, C/N-ratio, bulk density, mean annual temperature, and mean  
 935 annual precipitation;

936 <sup>2)</sup> i.s.: incertae sedis

937 Table S7: Number of land-use-indicative bacterial OTUs grouped by family. All families  
 938 containing at least one indicative OTU, as well as families represented in Figure 4c are  
 939 shown.

| Family                | indicative and core OTUs (all indicative OTUs) <sup>1)</sup> |           |      |       |       |      |      |       |      |         | Figure 4d | Max. Abund |
|-----------------------|--------------------------------------------------------------|-----------|------|-------|-------|------|------|-------|------|---------|-----------|------------|
|                       | Number of OTUs                                               |           |      |       |       |      |      |       |      |         |           |            |
|                       | Total                                                        | site-core | Ind. | A     | AG    | G    | AF   | FG    | F    | Cluster |           |            |
| Pedospaeraceae        | 403                                                          | 255       | 36   | 4(5)  | 7(11) | 3(3) | 0(0) | 1(12) | 3(5) | VII     | F         |            |
| WD2101 soil group     | 223                                                          | 151       | 34   | 2(5)  | 9(18) | 1(2) | 0(0) | 1(4)  | 1(5) | VII     | F         |            |
| Chitinophagaceae      | 236                                                          | 130       | 31   | 4(10) | 3(12) | 2(2) | 0(0) | 1(4)  | 1(3) | V       | FG        |            |
| Chthoniobacteraceae   | 223                                                          | 155       | 23   | 1(1)  | 4(12) | 0(1) | 0(0) | 2(5)  | 3(4) | III     | FG        |            |
| Gemmataceae           | 696                                                          | 318       | 20   | 0(0)  | 2(5)  | 1(1) | 0(0) | 0(14) | 0(0) | V       | AGF       |            |
| Solibacteraceae Sg 3  | 111                                                          | 81        | 17   | 0(0)  | 0(2)  | 0(0) | 0(0) | 3(12) | 1(3) | VII     | FG        |            |
| Gemmatimonadaceae     | 271                                                          | 180       | 17   | 5(9)  | 3(5)  | 0(0) | 0(0) | 0(2)  | 1(1) | VI      | A         |            |
| Pirellulaceae         | 302                                                          | 152       | 15   | 4(5)  | 1(8)  | 0(0) | 0(0) | 0(2)  | 0(0) | V       | A         |            |
| Burkholderiaceae      | 129                                                          | 80        | 14   | 1(2)  | 4(7)  | 0(0) | 0(0) | 0(1)  | 3(4) | VII     | AGF       |            |
| Xanthomonadaceae      | 36                                                           | 22        | 12   | 1(2)  | 2(8)  | 0(0) | 0(1) | 0(1)  | 0(0) |         |           |            |
| SC-I-84               | 51                                                           | 44        | 10   | 1(1)  | 2(4)  | 2(2) | 0(0) | 0(3)  | 0(0) |         |           |            |
| Acidobacteriaceae Sg1 | 26                                                           | 23        | 9    | 0(0)  | 0(0)  | 0(0) | 0(0) | 0(1)  | 6(8) | VII     | F         |            |
| Haliangiaceae         | 201                                                          | 100       | 9    | 2(2)  | 0(5)  | 0(0) | 0(0) | 0(2)  | 0(0) | V       | AG        |            |
| Acetobacteraceae      | 42                                                           | 25        | 8    | 0(0)  | 0(0)  | 0(0) | 0(0) | 2(2)  | 4(6) | VII     | F         |            |
| Sphingobacteriaceae   | 65                                                           | 32        | 8    | 1(1)  | 0(2)  | 0(0) | 0(0) | 0(1)  | 2(4) | VII     | F         |            |
| Anaerolineaceae       | 134                                                          | 87        | 8    | 4(4)  | 0(3)  | 0(0) | 0(0) | 0(1)  | 0(0) | VI      | A         |            |
| Acidothermaceae       | 18                                                           | 15        | 7    | 0(0)  | 0(0)  | 0(0) | 0(0) | 2(3)  | 2(4) | VII     | F         |            |
| Methylacidiphilaceae  | 81                                                           | 31        | 7    | 0(0)  | 0(0)  | 0(0) | 0(0) | 0(2)  | 2(5) | VII     | F         |            |
| Phycisphaeraceae      | 254                                                          | 98        | 7    | 0(0)  | 2(7)  | 0(0) | 0(0) | 0(0)  | 0(0) | VI      | A         |            |
| Nitrosomonadaceae     | 79                                                           | 67        | 7    | 0(0)  | 1(4)  | 0(0) | 0(1) | 0(2)  | 0(0) | V       | A         |            |
| Caulobacteraceae      | 26                                                           | 21        | 6    | 0(0)  | 1(1)  | 0(0) | 0(0) | 0(0)  | 3(5) | VII     | F         |            |
| A21b                  | 23                                                           | 18        | 6    | 0(0)  | 0(1)  | 1(1) | 0(0) | 1(4)  | 0(0) | III     | FG        |            |
| Beijerinckiaceae      | 21                                                           | 10        | 6    | 0(0)  | 0(4)  | 0(0) | 0(0) | 0(1)  | 1(1) |         |           |            |
| Polyangiaceae         | 79                                                           | 44        | 6    | 0(0)  | 1(4)  | 0(0) | 0(0) | 0(2)  | 0(0) |         |           |            |
| A4b                   | 138                                                          | 88        | 5    | 3(5)  | 0(0)  | 0(0) | 0(0) | 0(0)  | 0(0) | VI      | A         |            |
| Pyrinomonadaceae      | 28                                                           | 22        | 5    | 4(4)  | 0(0)  | 0(0) | 0(0) | 0(1)  | 0(0) | VI      | A         |            |
| Flavobacteriaceae     | 52                                                           | 27        | 5    | 0(0)  | 3(5)  | 0(0) | 0(0) | 0(0)  | 0(0) | V       | AG        |            |
| Koribacteraceae       | 11                                                           | 11        | 5    | 0(0)  | 0(0)  | 2(2) | 0(0) | 2(3)  | 0(0) | III     | FG        |            |
| Nocardiodaceae        | 28                                                           | 16        | 5    | 1(1)  | 0(4)  | 0(0) | 0(0) | 0(0)  | 0(0) | II      | AF        |            |
| 67-14                 | 56                                                           | 32        | 5    | 2(2)  | 1(3)  | 0(0) | 0(0) | 0(0)  | 0(0) |         |           |            |
| CPla-3_termite_group  | 39                                                           | 29        | 5    | 0(0)  | 2(2)  | 0(0) | 0(0) | 0(2)  | 1(1) |         |           |            |
| JG30-KF-CM45          | 86                                                           | 45        | 5    | 2(4)  | 1(1)  | 0(0) | 0(0) | 0(0)  | 0(0) |         |           |            |
| Verrucomicrobiaceae   | 83                                                           | 38        | 5    | 1(2)  | 1(3)  | 0(0) | 0(0) | 0(0)  | 0(0) |         |           |            |
| Micropepsaceae        | 16                                                           | 15        | 4    | 0(0)  | 0(0)  | 0(0) | 0(0) | 2(4)  | 0(0) | VII     | F         |            |
| Opitutaceae           | 48                                                           | 31        | 4    | 0(0)  | 1(2)  | 0(0) | 0(0) | 0(1)  | 0(1) | VII     | F         |            |
| Ilumatobacteraceae    | 13                                                           | 11        | 4    | 0(1)  | 3(3)  | 0(0) | 0(0) | 0(0)  | 0(0) | V       | AG        |            |
| AKYH767               | 66                                                           | 35        | 4    | 0(0)  | 4(4)  | 0(0) | 0(0) | 0(0)  | 0(0) |         |           |            |
| Fimbriimonadaceae     | 62                                                           | 34        | 4    | 2(2)  | 0(1)  | 0(0) | 0(0) | 0(0)  | 0(1) |         |           |            |
| Gaiellaceae           | 18                                                           | 15        | 4    | 0(0)  | 2(4)  | 0(0) | 0(0) | 0(0)  | 0(0) |         |           |            |
| Geobacteraceae        | 35                                                           | 23        | 4    | 0(0)  | 1(4)  | 0(0) | 0(0) | 0(0)  | 0(0) |         |           |            |
| Sphingomonadaceae     | 29                                                           | 25        | 4    | 0(2)  | 1(1)  | 0(0) | 0(0) | 0(0)  | 0(1) |         |           |            |
| Blastocatellaceae     | 18                                                           | 17        | 3    | 0(1)  | 0(1)  | 0(0) | 0(0) | 0(1)  | 0(0) | V       | AG        |            |
| TRA3-20               | 17                                                           | 15        | 3    | 1(2)  | 0(1)  | 0(0) | 0(0) | 0(0)  | 0(0) | II      | AF        |            |
| Bdellovibrionaceae    | 265                                                          | 50        | 3    | 0(0)  | 0(2)  | 0(0) | 0(0) | 0(0)  | 0(1) |         |           |            |
| Fibrobacteraceae      | 26                                                           | 11        | 3    | 0(0)  | 1(2)  | 0(0) | 0(0) | 0(1)  | 0(0) |         |           |            |
| Iamiaceae             | 19                                                           | 13        | 3    | 0(0)  | 2(3)  | 0(0) | 0(0) | 0(0)  | 0(0) |         |           |            |
| Isosphaeraceae        | 76                                                           | 24        | 3    | 0(0)  | 0(0)  | 0(0) | 0(1) | 1(1)  | 1(1) |         |           |            |
| Microscillaceae       | 73                                                           | 40        | 3    | 0(0)  | 1(1)  | 0(0) | 0(0) | 0(2)  | 0(0) |         |           |            |
| Solirubrobacteraceae  | 44                                                           | 23        | 3    | 0(0)  | 0(1)  | 0(0) | 0(0) | 0(2)  | 0(0) |         |           |            |
| Steroidobacteraceae   | 21                                                           | 15        | 3    | 1(1)  | 0(2)  | 0(0) | 0(0) | 0(0)  | 0(0) |         |           |            |
| Rhodanobacteraceae    | 45                                                           | 31        | 2    | 0(0)  | 0(0)  | 0(0) | 0(0) | 1(1)  | 0(1) | VII     | F         |            |
| Blrii41               | 63                                                           | 34        | 2    | 0(0)  | 0(1)  | 1(1) | 0(0) | 0(0)  | 0(0) | V       | AG        |            |
| Pseudonocardiaceae    | 14                                                           | 8         | 2    | 0(0)  | 0(2)  | 0(0) | 0(0) | 0(0)  | 0(0) | V       | AG        |            |
| Ktedonobacteraceae    | 210                                                          | 112       | 2    | 0(0)  | 0(0)  | 0(0) | 0(0) | 0(2)  | 0(0) | IV      | G         |            |
| Bacillaceae           | 14                                                           | 4         | 2    | 0(0)  | 2(2)  | 0(0) | 0(0) | 0(0)  | 0(0) |         |           |            |
| Caldilineaceae        | 51                                                           | 22        | 2    | 1(1)  | 0(1)  | 0(0) | 0(0) | 0(0)  | 0(0) |         |           |            |
| Elsteraceae           | 18                                                           | 8         | 2    | 0(0)  | 0(0)  | 0(0) | 0(0) | 0(0)  | 0(2) |         |           |            |
| Herpetosiphonaceae    | 15                                                           | 7         | 2    | 2(2)  | 0(0)  | 0(0) | 0(0) | 0(0)  | 0(0) |         |           |            |
| Hymenobacteraceae     | 26                                                           | 8         | 2    | 0(0)  | 1(2)  | 0(0) | 0(0) | 0(0)  | 0(0) |         |           |            |
| Methylophilaceae      | 12                                                           | 8         | 2    | 1(1)  | 0(1)  | 0(0) | 0(0) | 0(0)  | 0(0) |         |           |            |

07-06-2021

|                        |      |      |     |       |       |      |      |       |      |    |     |
|------------------------|------|------|-----|-------|-------|------|------|-------|------|----|-----|
| NS11-12 marine group   | 40   | 9    | 2   | 0(0)  | 1(2)  | 0(0) | 0(0) | 0(0)  | 0(0) |    |     |
| Solimonadaceae         | 31   | 7    | 2   | 1(1)  | 0(1)  | 0(0) | 0(0) | 0(0)  | 0(0) |    |     |
| Xiphinematobacteraceae | 14   | 10   | 2   | 0(0)  | 0(0)  | 0(0) | 0(0) | 1(1)  | 1(1) |    |     |
| Dongiaceae             | 8    | 6    | 1   | 0(0)  | 0(0)  | 0(0) | 0(1) | 0(0)  | 0(0) | II | AF  |
| Xanthobacteraceae      | 16   | 16   | 1   | 0(0)  | 0(0)  | 0(0) | 0(0) | 1(1)  | 0(0) | I  | AGF |
| 37-13                  | 22   | 14   | 1   | 0(0)  | 1(1)  | 0(0) | 0(0) | 0(0)  | 0(0) |    |     |
| Aeromonadaceae         | 1    | 1    | 1   | 0(0)  | 0(1)  | 0(0) | 0(0) | 0(0)  | 0(0) |    |     |
| Amb-16S-1034           | 1    | 1    | 1   | 0(0)  | 0(0)  | 0(0) | 0(0) | 0(1)  | 0(0) |    |     |
| Azospirillaceae        | 1    | 1    | 1   | 0(1)  | 0(0)  | 0(0) | 0(0) | 0(0)  | 0(0) |    |     |
| Cellvibrionaceae       | 13   | 3    | 1   | 0(0)  | 0(1)  | 0(0) | 0(0) | 0(0)  | 0(0) |    |     |
| Clostridiaceae_1       | 17   | 5    | 1   | 0(0)  | 0(1)  | 0(0) | 0(0) | 0(0)  | 0(0) |    |     |
| Cytophagaceae          | 32   | 7    | 1   | 0(0)  | 0(1)  | 0(0) | 0(0) | 0(0)  | 0(0) |    |     |
| Demequinaceae          | 2    | 1    | 1   | 0(0)  | 0(1)  | 0(0) | 0(0) | 0(0)  | 0(0) |    |     |
| Frankiaceae            | 4    | 3    | 1   | 0(0)  | 0(0)  | 0(0) | 0(0) | 0(1)  | 0(0) |    |     |
| Geodermatophilaceae    | 4    | 2    | 1   | 1(1)  | 0(0)  | 0(0) | 0(0) | 0(0)  | 0(0) |    |     |
| Inquillinaceae         | 6    | 5    | 1   | 0(0)  | 0(0)  | 0(0) | 0(0) | 0(0)  | 1(1) |    |     |
| Intrasporangiaceae     | 4    | 4    | 1   | 0(0)  | 1(1)  | 0(0) | 0(0) | 0(0)  | 0(0) |    |     |
| JG30-KF-AS9            | 39   | 17   | 1   | 0(0)  | 0(0)  | 1(1) | 0(0) | 0(0)  | 0(0) |    |     |
| KF-JG30-B3             | 6    | 5    | 1   | 0(0)  | 0(0)  | 0(0) | 0(0) | 0(0)  | 0(1) |    |     |
| Longimicrobiaceae      | 33   | 4    | 1   | 0(1)  | 0(0)  | 0(0) | 0(0) | 0(0)  | 0(0) |    |     |
| Methyloligellaceae     | 3    | 2    | 1   | 1(1)  | 0(0)  | 0(0) | 0(0) | 0(0)  | 0(0) |    |     |
| Micrococcaceae         | 4    | 1    | 1   | 0(0)  | 1(1)  | 0(0) | 0(0) | 0(0)  | 0(0) |    |     |
| Micromonosporaceae     | 30   | 16   | 1   | 0(0)  | 0(0)  | 0(0) | 0(0) | 0(1)  | 0(0) |    |     |
| mle1-27                | 68   | 11   | 1   | 0(0)  | 0(1)  | 0(0) | 0(0) | 0(0)  | 0(0) |    |     |
| Mycobacteriaceae       | 11   | 10   | 1   | 0(0)  | 1(1)  | 0(0) | 0(0) | 0(0)  | 0(0) |    |     |
| Nannocystaceae         | 14   | 7    | 1   | 1(1)  | 0(0)  | 0(0) | 0(0) | 0(0)  | 0(0) |    |     |
| Nitrospiraceae         | 24   | 20   | 1   | 0(0)  | 1(1)  | 0(0) | 0(0) | 0(0)  | 0(0) |    |     |
| NS9_marine_group       | 17   | 4    | 1   | 0(0)  | 0(1)  | 0(0) | 0(0) | 0(0)  | 0(0) |    |     |
| P3OB-42                | 57   | 10   | 1   | 0(0)  | 0(1)  | 0(0) | 0(0) | 0(0)  | 0(0) |    |     |
| Peptostreptococcaceae  | 4    | 3    | 1   | 0(0)  | 0(1)  | 0(0) | 0(0) | 0(0)  | 0(0) |    |     |
| Puniceicoccaceae       | 17   | 7    | 1   | 0(0)  | 0(0)  | 0(0) | 0(0) | 0(0)  | 0(1) |    |     |
| Rhodobacteraceae       | 15   | 8    | 1   | 0(0)  | 0(1)  | 0(0) | 0(0) | 0(0)  | 0(0) |    |     |
| Rhodocyclaceae         | 31   | 17   | 1   | 0(0)  | 1(1)  | 0(0) | 0(0) | 0(0)  | 0(0) |    |     |
| Rhodomicrobiaceae      | 2    | 2    | 1   | 0(0)  | 0(0)  | 0(0) | 0(0) | 0(1)  | 0(0) |    |     |
| Rhodopirillaceae       | 9    | 5    | 1   | 0(0)  | 0(0)  | 0(1) | 0(0) | 0(0)  | 0(0) |    |     |
| Roseiflexaceae         | 63   | 34   | 1   | 0(0)  | 1(1)  | 0(0) | 0(0) | 0(0)  | 0(0) |    |     |
| Rubinisphaeraceae      | 19   | 11   | 1   | 1(1)  | 0(0)  | 0(0) | 0(0) | 0(0)  | 0(0) |    |     |
| Rubritaleaceae         | 15   | 13   | 1   | 0(0)  | 1(1)  | 0(0) | 0(0) | 0(0)  | 0(0) |    |     |
| SM2D12                 | 97   | 15   | 1   | 0(0)  | 0(0)  | 0(0) | 0(0) | 0(0)  | 0(1) |    |     |
| Tepidisphaeraceae      | 13   | 8    | 1   | 0(1)  | 0(0)  | 0(0) | 0(0) | 0(0)  | 0(0) |    |     |
| Thermoanaerobaculaceae | 70   | 28   | 1   | 0(1)  | 0(0)  | 0(0) | 0(0) | 0(0)  | 0(0) |    |     |
| Saprospiraceae         | 37   | 14   | 0   | 0(0)  | 0(0)  | 0(0) | 0(0) | 0(0)  | 0(0) | VI | A   |
| Sandaracinaceae        | 90   | 20   | 0   | 0(0)  | 0(0)  | 0(0) | 0(0) | 0(0)  | 0(0) | V  | AG  |
| Rhizobiaceae           | 8    | 7    | 0   | 0(0)  | 0(0)  | 0(0) | 0(0) | 0(0)  | 0(0) | I  | AGF |
| unclassified           |      |      |     | 29    | 27    | 9    | 0    | 20    | 10   |    |     |
| or incertae sedis      | 9352 | 3068 | 208 | (41)  | (84)  | (12) | (0)  | (54)  | (17) |    |     |
| rest                   | 2211 | 431  | 0   | 0     | 0     | 0    | 0    | 0     | 0    |    |     |
|                        | 1814 |      |     | 86    | 105   | 23   | 0    | 42    | 48   |    |     |
| all                    | 0    | 6979 | 699 | (128) | (287) | (29) | (4)  | (162) | (89) |    |     |

940 <sup>1)</sup> indicative and core OTUs: OTUs, which are indicative and core of the same land-use type(s), note that OTUs  
 941 cannot be indicative of all sites, i.e., the combination AGF.

07-06-2021

942 Table S8: Number of land-use-indicative fungal OTUs grouped by family. All families  
 943 containing at least one indicative OTU, as well as families represented in Figure 4d are  
 944 shown.

| Family               | Number of OTUs |           |            | indicative and core OTUs (all indicative OTUs) <sup>1)</sup> |      |      |      |      |      | Figure 4d |            |
|----------------------|----------------|-----------|------------|--------------------------------------------------------------|------|------|------|------|------|-----------|------------|
|                      | Total          | site-core | indicative | A                                                            | AG   | G    | AF   | FG   | F    | Cluster   | Max. Abund |
| Lasiochaetaceae      | 58             | 41        | 12         | 3(4)                                                         | 2(7) | 0(1) | 0(0) | 0(0) | 0(0) | III       | A          |
| Nectriaceae          | 52             | 27        | 11         | 1(1)                                                         | 3(9) | 0(0) | 0(0) | 0(1) | 0(0) | III       | A          |
| Herpotrichiellaceae  | 143            | 67        | 7          | 0(2)                                                         | 0(1) | 0(0) | 0(0) | 0(0) | 1(4) | IV        | G          |
| Mortierellaceae      | 129            | 58        | 7          | 0(0)                                                         | 2(5) | 1(1) | 0(0) | 0(0) | 1(1) | IV        | G          |
| Helotiaceae          | 120            | 44        | 7          | 0(2)                                                         | 3(4) | 0(0) | 0(0) | 0(0) | 0(1) | III       | A          |
| Hypocreaceae         | 25             | 11        | 6          | 0(2)                                                         | 0(2) | 0(0) | 0(2) | 0(0) | 0(0) |           |            |
| Myxotrichaceae       | 40             | 18        | 4          | 0(0)                                                         | 0(0) | 0(0) | 0(0) | 0(0) | 2(4) | V         | F          |
| Plectosphaerellaceae | 23             | 8         | 4          | 2(3)                                                         | 1(1) | 0(0) | 0(0) | 0(0) | 0(0) | III       | A          |
| Hyaloscyphaceae      | 85             | 40        | 4          | 0(0)                                                         | 0(2) | 0(1) | 0(0) | 0(0) | 0(1) |           |            |
| Cucurbitariaceae     | 14             | 9         | 3          | 0(0)                                                         | 0(2) | 1(1) | 0(0) | 0(0) | 0(0) | IV        | G          |
| Bulleribasidiaceae   | 26             | 7         | 3          | 0(1)                                                         | 1(2) | 0(0) | 0(0) | 0(0) | 0(0) | III       | AG         |
| Chaetomiaceae        | 39             | 20        | 3          | 2(2)                                                         | 0(0) | 0(1) | 0(0) | 0(0) | 0(0) | III       | A          |
| Mrakiaceae           | 7              | 4         | 3          | 0(3)                                                         | 0(0) | 0(0) | 0(0) | 0(0) | 0(0) | III       | A          |
| Dermateaceae         | 25             | 10        | 2          | 0(0)                                                         | 1(1) | 0(0) | 0(0) | 0(0) | 0(1) | IV        | G          |
| Tricholomataceae     | 103            | 37        | 2          | 0(0)                                                         | 0(0) | 0(1) | 0(0) | 0(0) | 1(1) | IV        | G          |
| Clavicipitaceae      | 35             | 19        | 2          | 0(0)                                                         | 0(2) | 0(0) | 0(0) | 0(0) | 0(0) | II        | AG         |
| Pseudeurotiaceae     | 15             | 11        | 2          | 0(0)                                                         | 1(1) | 0(0) | 0(0) | 0(0) | 1(1) | II        | AG         |
| Chaetosphaeriaceae   | 36             | 16        | 2          | 0(0)                                                         | 0(1) | 0(1) | 0(0) | 0(0) | 0(0) |           |            |
| Gloniaceae           | 11             | 10        | 2          | 0(0)                                                         | 0(0) | 0(0) | 0(0) | 0(0) | 1(2) |           |            |
| Leucosporidiaceae    | 7              | 3         | 2          | 0(0)                                                         | 0(2) | 0(0) | 0(0) | 0(0) | 0(0) |           |            |
| Phaeosphaeriaceae    | 53             | 13        | 2          | 1(1)                                                         | 1(1) | 0(0) | 0(0) | 0(0) | 0(0) |           |            |
| Leotiaceae           | 43             | 24        | 1          | 0(0)                                                         | 0(0) | 0(1) | 0(0) | 0(0) | 0(0) | V         | F          |
| Chaetothyriaceae     | 4              | 2         | 1          | 0(0)                                                         | 0(0) | 0(1) | 0(0) | 0(0) | 0(0) | IV        | G          |
| Piskurozymaceae      | 11             | 3         | 1          | 0(0)                                                         | 0(1) | 0(0) | 0(0) | 0(0) | 0(0) | III       | A          |
| Pyronemataceae       | 92             | 38        | 1          | 0(0)                                                         | 0(1) | 0(0) | 0(0) | 0(0) | 0(0) | III       | A          |
| Bionectriaceae       | 9              | 7         | 1          | 0(0)                                                         | 1(1) | 0(0) | 0(0) | 0(0) | 0(0) | II        | AG         |
| Myrmecridiaceae      | 8              | 2         | 1          | 0(0)                                                         | 1(1) | 0(0) | 0(0) | 0(0) | 0(0) | II        | AG         |
| Sordariaceae         | 4              | 1         | 1          | 0(0)                                                         | 1(1) | 0(0) | 0(0) | 0(0) | 0(0) | II        | AG         |
| Sporormiaceae        | 23             | 5         | 1          | 0(0)                                                         | 1(1) | 0(0) | 0(0) | 0(0) | 0(0) | II        | AG         |
| Ascobolaceae         | 13             | 7         | 1          | 0(0)                                                         | 0(1) | 0(0) | 0(0) | 0(0) | 0(0) |           |            |
| Aspergillaceae       | 51             | 22        | 1          | 0(0)                                                         | 0(0) | 0(0) | 0(0) | 0(0) | 0(1) |           |            |
| Cystofilobasidiaceae | 5              | 2         | 1          | 0(1)                                                         | 0(0) | 0(0) | 0(0) | 0(0) | 0(0) | III       | A          |
| Didymellaceae        | 7              | 2         | 1          | 0(0)                                                         | 1(1) | 0(0) | 0(0) | 0(0) | 0(0) |           |            |
| Didymosphaeriaceae   | 6              | 3         | 1          | 0(0)                                                         | 0(1) | 0(0) | 0(0) | 0(0) | 0(0) |           |            |
| Filobasidiaceae      | 10             | 1         | 1          | 0(1)                                                         | 0(0) | 0(0) | 0(0) | 0(0) | 0(0) |           |            |
| Hyponectriaceae      | 4              | 2         | 1          | 0(0)                                                         | 0(1) | 0(0) | 0(0) | 0(0) | 0(0) |           |            |
| Leptosphaeriaceae    | 19             | 5         | 1          | 0(1)                                                         | 0(0) | 0(0) | 0(0) | 0(0) | 0(0) |           |            |
| Magnaporthaceae      | 17             | 5         | 1          | 0(0)                                                         | 0(1) | 0(0) | 0(0) | 0(0) | 0(0) |           |            |
| Melanommataceae      | 5              | 2         | 1          | 0(0)                                                         | 0(1) | 0(0) | 0(0) | 0(0) | 0(0) |           |            |
| Microdochiaceae      | 5              | 3         | 1          | 0(1)                                                         | 0(0) | 0(0) | 0(0) | 0(0) | 0(0) |           |            |
| Minutisphaeraceae    | 6              | 2         | 1          | 0(0)                                                         | 0(0) | 1(1) | 0(0) | 0(0) | 0(0) |           |            |
| Mucoraceae           | 21             | 9         | 1          | 0(0)                                                         | 0(1) | 0(0) | 0(0) | 0(0) | 0(0) |           |            |
| Periconiaceae        | 6              | 2         | 1          | 1(1)                                                         | 0(0) | 0(0) | 0(0) | 0(0) | 0(0) |           |            |
| Pleosporaceae        | 20             | 5         | 1          | 0(1)                                                         | 0(0) | 0(0) | 0(0) | 0(0) | 0(0) |           |            |
| Thyridariaceae       | 2              | 1         | 1          | 0(0)                                                         | 0(1) | 0(0) | 0(0) | 0(0) | 0(0) |           |            |
| Torulaceae           | 6              | 1         | 1          | 0(1)                                                         | 0(0) | 0(0) | 0(0) | 0(0) | 0(0) |           |            |
| Trichocomaceae       | 18             | 9         | 1          | 0(1)                                                         | 0(0) | 0(0) | 0(0) | 0(0) | 0(0) |           |            |
| Trichosporonaceae    | 7              | 3         | 1          | 0(0)                                                         | 1(1) | 0(0) | 0(0) | 0(0) | 0(0) |           |            |
| Venturiaceae         | 38             | 22        | 1          | 0(0)                                                         | 0(0) | 0(0) | 0(0) | 0(0) | 1(1) |           |            |
| Vibrisseaceae        | 10             | 5         | 1          | 0(0)                                                         | 0(0) | 0(0) | 0(0) | 0(0) | 0(1) |           |            |
| Atheliaceae          | 42             | 26        | 0          | 0(0)                                                         | 0(0) | 0(0) | 0(0) | 0(0) | 0(0) | V         | F          |
| Clavulinaceae        | 27             | 16        | 0          | 0(0)                                                         | 0(0) | 0(0) | 0(0) | 0(0) | 0(0) | V         | F          |
| Cortinariaceae       | 129            | 48        | 0          | 0(0)                                                         | 0(0) | 0(0) | 0(0) | 0(0) | 0(0) | V         | F          |
| Elaphomycetaceae     | 9              | 6         | 0          | 0(0)                                                         | 0(0) | 0(0) | 0(0) | 0(0) | 0(0) | V         | F          |
| Hydnodontaceae       | 35             | 13        | 0          | 0(0)                                                         | 0(0) | 0(0) | 0(0) | 0(0) | 0(0) | V         | F          |
| Hygrophoraceae       | 44             | 23        | 0          | 0(0)                                                         | 0(0) | 0(0) | 0(0) | 0(0) | 0(0) | V         | F          |
| Inocybaceae          | 122            | 69        | 0          | 0(0)                                                         | 0(0) | 0(0) | 0(0) | 0(0) | 0(0) | V         | F          |
| Rhizoglyphaceae      | 20             | 6         | 0          | 0(0)                                                         | 0(0) | 0(0) | 0(0) | 0(0) | 0(0) | V         | F          |
| Russulaceae          | 85             | 60        | 0          | 0(0)                                                         | 0(0) | 0(0) | 0(0) | 0(0) | 0(0) | V         | F          |
| Sebacinaceae         | 64             | 43        | 0          | 0(0)                                                         | 0(0) | 0(0) | 0(0) | 0(0) | 0(0) | V         | F          |

07-06-2021

|                          |      |      |     |        |        |       |      |      |        |    |     |
|--------------------------|------|------|-----|--------|--------|-------|------|------|--------|----|-----|
| Theleporaceae            | 136  | 70   | 0   | 0(0)   | 0(0)   | 0(0)  | 0(0) | 0(0) | 0(0)   | V  | F   |
| Clavariaceae             | 166  | 71   | 0   | 0(0)   | 0(0)   | 0(0)  | 0(0) | 0(0) | 0(0)   | IV | G   |
| Ophiocordycipitaceae     | 20   | 7    | 0   | 0(0)   | 0(0)   | 0(0)  | 0(0) | 0(0) | 0(0)   | IV | G   |
| Trimorphomycetaceae      | 5    | 2    | 0   | 0(0)   | 0(0)   | 0(0)  | 0(0) | 0(0) | 0(0)   | I  | AGF |
| <hr/>                    |      |      |     |        |        |       |      |      |        |    |     |
| unclassified or incertae |      |      |     |        |        |       |      |      |        |    |     |
| sedis                    | 4256 | 1187 | 52  | 6(18)  | 4(21)  | 3(6)  | 0(0) | 0(0) | 3(7)   |    |     |
| Rest                     | 1801 | 487  | 0   | 0      | 0      | 0     | 0    | 0    | 0      |    |     |
| All                      | 8477 | 2802 | 171 | 16(47) | 25(79) | 6(16) | 0(2) | 0(1) | 11(26) |    |     |

945 <sup>1)</sup> indicative and core OTUs: OTUs, which are indicative and core of the same land-use type(s), note that OTUs  
 946 cannot be indicative of all sites, i.e., the combination AGF.  
 947

07-06-2021

948 Table S9: Relative abundances of bacterial phyla in arable land, permanent grassland, and  
 949 forest. Mean values ( $\pm$  standard deviations) of each land-use type are shown. Different letters  
 950 indicate significant differences (Dunn Test,  $p < 0.05$ ).

| Phylum            | Arable land (A)<br>[%] |            | Permanent<br>Grassland (G) [%] |            | Forest (F)<br>[%] |            | Pattern <sup>1)</sup> |
|-------------------|------------------------|------------|--------------------------------|------------|-------------------|------------|-----------------------|
| Proteobacteria    | 22.4                   | $\pm$ 1.97 | 21.1                           | $\pm$ 2.12 | 26.8              | $\pm$ 4.21 | G<A<F                 |
| Verrucomicrobia   | 14.2                   | $\pm$ 4.03 | 20.4                           | $\pm$ 5.22 | 22.7              | $\pm$ 9.01 | A<G=F                 |
| Acidobacteria     | 14.3                   | $\pm$ 2.05 | 16.1                           | $\pm$ 5.41 | 17.1              | $\pm$ 6.78 | A=G=F                 |
| Planctomycetes    | 9.3                    | $\pm$ 1.96 | 9.6                            | $\pm$ 1.49 | 7.3               | $\pm$ 1.82 | A=G>F                 |
| Chloroflexi       | 9.1                    | $\pm$ 2.00 | 7.3                            | $\pm$ 2.35 | 5.1               | $\pm$ 2.92 | A>G>F                 |
| Bacteroidetes     | 7.6                    | $\pm$ 2.17 | 5.6                            | $\pm$ 1.98 | 3.5               | $\pm$ 1.29 | A>G>F                 |
| Actinobacteria    | 4.8                    | $\pm$ 1.43 | 3.4                            | $\pm$ 1.19 | 3.7               | $\pm$ 1.53 | A>G=F                 |
| Patescibacteria   | 1.9                    | $\pm$ 1.15 | 1.9                            | $\pm$ 0.93 | 1.9               | $\pm$ 1.14 | A=G=F                 |
| Gemmatimonadetes  | 2.7                    | $\pm$ 0.59 | 1.5                            | $\pm$ 0.46 | 1.1               | $\pm$ 0.60 | A>G>F                 |
| Latescibacteria   | 1.4                    | $\pm$ 0.45 | 1.8                            | $\pm$ 0.84 | 0.4               | $\pm$ 0.49 | A=G>F                 |
| Rokubacteria      | 1.0                    | $\pm$ 0.37 | 1.3                            | $\pm$ 0.49 | 0.8               | $\pm$ 0.80 | A=G>F                 |
| Nitrospirae       | 0.8                    | $\pm$ 0.38 | 0.9                            | $\pm$ 0.53 | 0.4               | $\pm$ 0.58 | A=G>F                 |
| Candidate WPS-2   | 0.0                    | $\pm$ 0.00 | 0.2                            | $\pm$ 0.48 | 0.8               | $\pm$ 1.17 | A<G<F                 |
| Armatimonadetes   | 0.4                    | $\pm$ 0.20 | 0.1                            | $\pm$ 0.14 | 0.3               | $\pm$ 0.22 | A>F>G                 |
| Elusimicrobia     | 0.2                    | $\pm$ 0.08 | 0.3                            | $\pm$ 0.08 | 0.2               | $\pm$ 0.08 | A=F<G                 |
| Cyanobacteria     | 0.1                    | $\pm$ 0.04 | 0.1                            | $\pm$ 0.17 | 0.3               | $\pm$ 0.31 | A=G<F                 |
| Firmicutes        | 0.2                    | $\pm$ 0.13 | 0.2                            | $\pm$ 0.12 | 0.0               | $\pm$ 0.05 | A=G>F                 |
| Chlamydiae        | 0.0                    | $\pm$ 0.02 | 0.0                            | $\pm$ 0.06 | 0.2               | $\pm$ 0.20 | A<G<F                 |
| Fibrobacteres     | 0.1                    | $\pm$ 0.04 | 0.1                            | $\pm$ 0.06 | 0.0               | $\pm$ 0.03 | G>A>F                 |
| Candidate FCPU426 | 0.0                    | $\pm$ 0.03 | 0.1                            | $\pm$ 0.04 | 0.1               | $\pm$ 0.11 | A<G=F                 |
| Hydrogenedentes   | 0.1                    | $\pm$ 0.06 | 0.0                            | $\pm$ 0.01 | 0.0               | $\pm$ 0.02 | A>G=F                 |
| Dependentiae      | 0.0                    | $\pm$ 0.00 | 0.0                            | $\pm$ 0.02 | 0.0               | $\pm$ 0.08 | A<G<F                 |
| Entotheonellaeota | 0.0                    | $\pm$ 0.02 | 0.0                            | $\pm$ 0.01 | 0.0               | $\pm$ 0.09 | A>G=F                 |
| Candidate BRC1    | 0.0                    | $\pm$ 0.01 | 0.0                            | $\pm$ 0.01 | 0.0               | $\pm$ 0.01 | A>G>F                 |
| Candidate WS2     | 0.0                    | $\pm$ 0.02 | 0.0                            | $\pm$ 0.01 | 0.0               | $\pm$ 0.01 | A>G>F                 |
| Omnitrophicaeota  | 0.0                    | $\pm$ 0.04 | 0.0                            | $\pm$ 0.01 | 0.0               | $\pm$ 0.01 | A>G=F                 |
| Candidate GAL15   | 0.0                    | $\pm$ 0.01 | 0.0                            | $\pm$ 0.01 | 0.0               | $\pm$ 0.04 | A=G=F                 |
| Zixibacteria      | 0.0                    | $\pm$ 0.03 | 0.0                            | $\pm$ 0.01 | 0.0               | $\pm$ 0.01 | A=G=F                 |
| Spirochaetes      | 0.0                    | $\pm$ 0.00 | 0.0                            | $\pm$ 0.01 | 0.0               | $\pm$ 0.03 | G>A=F                 |
| Dadabacteria      | 0.0                    | $\pm$ 0.01 | 0.0                            | $\pm$ 0.00 | 0.0               | $\pm$ 0.01 | A=G=F                 |
| Candidate WS4     | 0.0                    | $\pm$ 0.00 | 0.0                            | $\pm$ 0.00 | 0.0               | $\pm$ 0.00 | A=G=F                 |
| Unclassified      | 0.3                    | $\pm$ 0.14 | 0.3                            | $\pm$ 0.08 | 0.1               | $\pm$ 0.07 | A=G>F                 |

951 <sup>1)</sup> Pattern: < and > operators indicate significant differences in relative abundance between land-use types, A:  
 952 arable land, G: grassland, F: forest.



07-06-2021

953 Table S10 Relative abundances of fungal phyla in arable land, permanent grassland, and  
 954 forest. Mean values ( $\pm$  standard deviations) of each land-use type are shown. Different letters  
 955 indicate significant differences (Dunn Test,  $p < 0.05$ ).  
 956

| Phylum             | Arable land (A) | Permanent Grassland (G) | Forest (F)       | Pattern <sup>1)</sup> |
|--------------------|-----------------|-------------------------|------------------|-----------------------|
| Ascomycota         | 55.4 $\pm$ 7.80 | 53.2 $\pm$ 12.56        | 22.2 $\pm$ 9.97  | A=G>F                 |
| Basidiomycota      | 11.7 $\pm$ 5.43 | 20.3 $\pm$ 18.55        | 55.7 $\pm$ 12.90 | A=G<F                 |
| Mortierellomycota  | 3.4 $\pm$ 2.42  | 7.3 $\pm$ 6.55          | 1.2 $\pm$ 1.02   | G>A>F                 |
| Chytridiomycota    | 2.1 $\pm$ 2.24  | 0.6 $\pm$ 0.61          | 0.0 $\pm$ 0.01   | A>G>F                 |
| Glomeromycota      | 1.1 $\pm$ 1.25  | 1.3 $\pm$ 1.07          | 0.0 $\pm$ 0.03   | G=A>F                 |
| Mucoromycota       | 0.1 $\pm$ 0.16  | 0.1 $\pm$ 0.08          | 0.5 $\pm$ 0.67   | A=G=F                 |
| Rozellomycota      | 0.0 $\pm$ 0.17  | 0.1 $\pm$ 0.10          | 0.0 $\pm$ 0.05   | A<F<G                 |
| Olpidiomycota      | 0.0 $\pm$ 0.05  | 0.0 $\pm$ 0.04          | 0.0 $\pm$ 0.00   | A=G>F                 |
| Blastocladiomycota | 0.0 $\pm$ 0.01  | 0.0 $\pm$ 0.02          | 0.0 $\pm$ 0.00   | G>A=F                 |
| unclassified       | 1.7 $\pm$ 1.41  | 1.0 $\pm$ 0.62          | 0.3 $\pm$ 0.37   | A>G>F                 |

957 <sup>1)</sup> Pattern: < and > operators indicate significant differences in relative abundance between land-use types, A:  
 958 arable land, G: grassland, F: forest.  
 959
